# Supplementary material
Source: PubMed Central journal article supplement (PMC2997958)
Supplement: NIHMS242040-supplement-1_si_001.pdf [file NIHMS242040-supplement-1_si_001.pdf]

# Conformational profile of a proline-arginine hybrid

Guillermo Revilla-López,<sup>1</sup> Ana I. Jiménez,<sup>2</sup> Carlos Cativiela,<sup>2</sup> Ruth Nussinov,<sup>3,4</sup>

Carlos Alemán,<sup>1,5,\*</sup> and David Zanuy<sup>1,\*</sup>

<sup>1</sup> *Departament d'Enginyeria Química, E. T. S. d'Enginyeria Industrial de Barcelona, Universitat Politècnica de Catalunya, Diagonal 647, Barcelona E-08028, Spain*

<sup>2</sup> *Departamento de Química Orgánica, Instituto de Ciencia de Materiales de Aragón, Universidad de Zaragoza–CSIC, 50009 Zaragoza, Spain*

<sup>3</sup> *Basic Science Program, SAIC-Frederick, Inc. Center for Cancer Research Nanobiology Program, NCI, Frederick, MD 21702, USA*

<sup>4</sup> *Department of Human Genetics Sackler, Medical School, Tel Aviv University, Tel Aviv 69978, Israel*

<sup>5</sup> *Center for Research in Nano-Engineering, Universitat Politècnica de Catalunya, Campus Sud, Edifici C', C/Pasqual i Vila s/n, Barcelona E-08028, Spain*

## Index of Contents

|                       |                   |                                                                                                                            |
|-----------------------|-------------------|----------------------------------------------------------------------------------------------------------------------------|
| <b>Page SI2</b>       | <b>Figure SI1</b> | Design of arginine surrogates with a proline skeleton                                                                      |
| <b>Page SI3</b>       | <b>Table SI1</b>  | Minimum energy conformations characterized for Ac- <i>t</i> -( <sup>β</sup> Pro)Arg-NHMe                                   |
| <b>Page SI4</b>       | <b>Table SI2</b>  | Minimum energy conformations characterized for Ac- <i>c</i> -( <sup>β</sup> Pro)Arg-NHMe                                   |
| <b>Page SI5-SI25</b>  |                   | Cartesian coordinates and relative energies of all the structures calculated for Ac- <i>t</i> -( <sup>β</sup> Pro)Arg-NHMe |
| <b>Page SI26-SI48</b> |                   | Cartesian coordinates and relative energies of all the structures calculated for Ac- <i>c</i> -( <sup>β</sup> Pro)Arg-NHMe |

**Figure S11.** Rational design of arginine surrogates with a proline skeleton. Combination of the latter frame with the guanidilated side chain of arginine generates the proline-like analogues studied previously [ $(\gamma\text{Pro})\text{Arg}$  (ref. 8)] and in the present work [ $\text{trans}-(\beta\text{Pro})\text{Arg}$  and  $\text{cis}-(\beta\text{Pro})\text{Arg}$ ]. The arginine surrogates are named according to the  $\gamma/\beta$  position of the proline skeleton bearing the guanidilated side chain and to the *trans/cis* relative orientation between this side chain and the carboxylic acid.

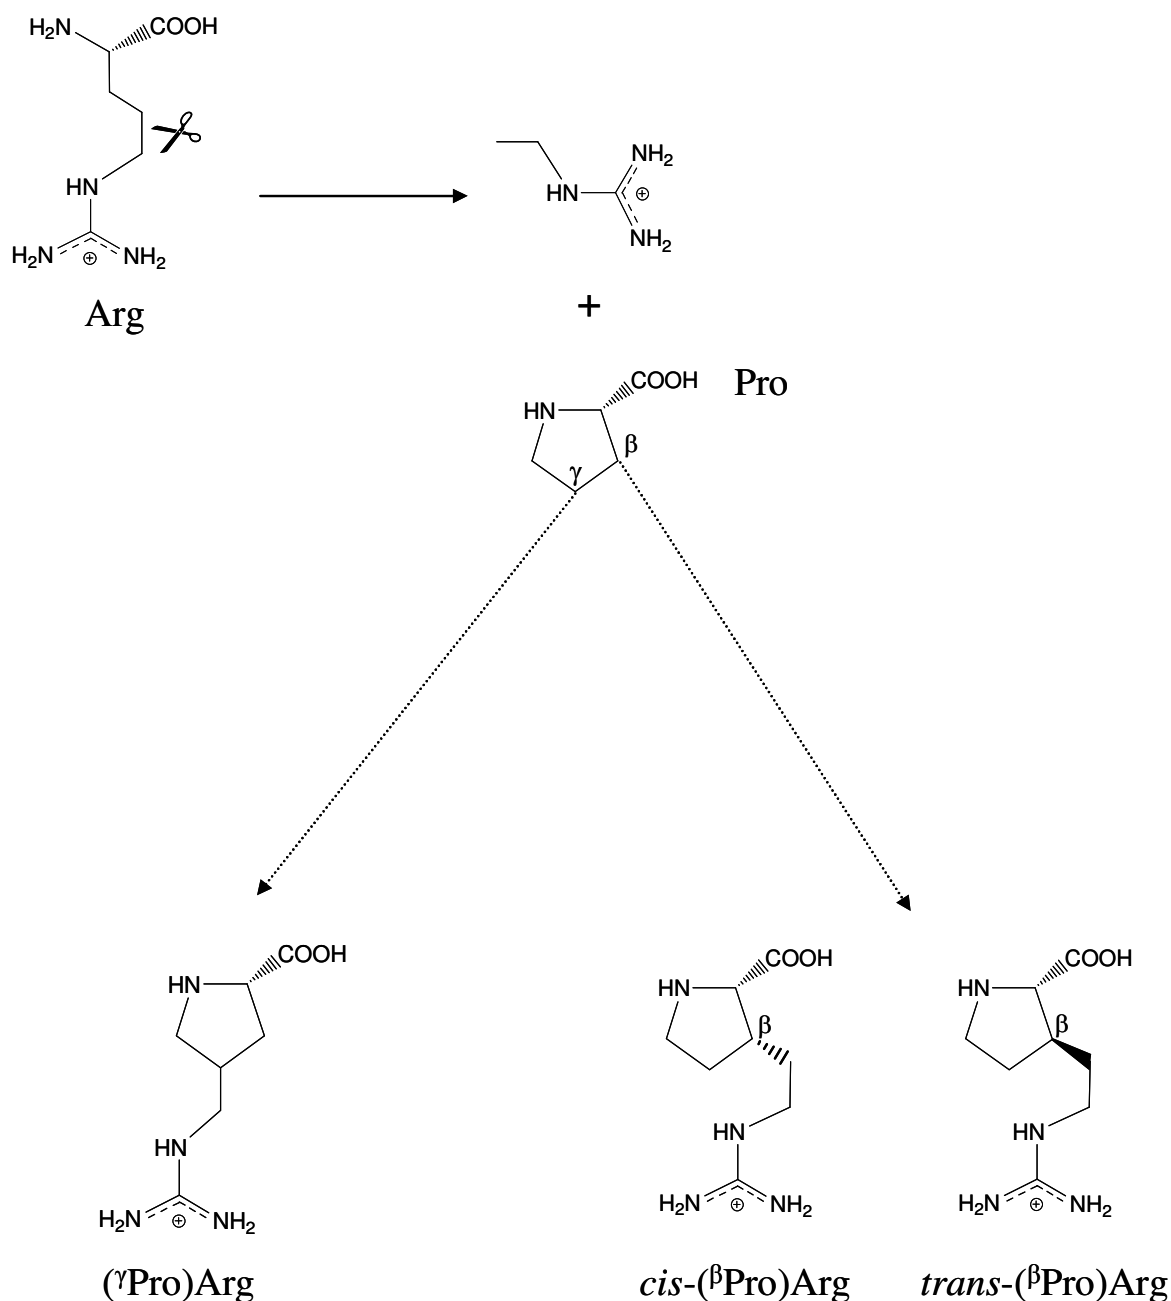

**Table S11.** Dihedral angles (in degrees; see Figure 2 for definition) and relative energy ( $\Delta E^{\text{sp}}$ ; in kcal/mol) of the minimum energy conformations characterized for Ac-*t*-( $^{\beta}$ Pro)Arg-NHMe in the gas phase at the B3LYP/6-31+G(d,p) level.

| Conformation                           | $\omega_0$ | $\varphi$ | $\psi$ | $\omega$ | $\chi^0$ | $\chi^1$ | $\chi^2$ | $\chi^3$ | $\chi^4$ | $\xi^1$ | $\xi^2$ | $\xi^3$ | $\Delta E^{\text{sp}}$ |
|----------------------------------------|------------|-----------|--------|----------|----------|----------|----------|----------|----------|---------|---------|---------|------------------------|
| $\gamma_{\text{L}}[\text{u}]s^-g^+t$   | -169.6     | -77.8     | 54.8   | 178.2    | -1.7     | -22.3    | 37.5     | -38.2    | 25.2     | -127.0  | 61.1    | 162.8   | 0.0                    |
| $\gamma_{\text{L}}[\text{u}]g^-g^-s^+$ | -170.3     | -79.9     | 59.5   | 179.1    | -5.7     | -18.4    | 34.9     | -38.0    | 27.5     | -84.2   | -77.5   | 117.9   | 1.1                    |
| $\gamma_{\text{L}}[\text{u}]g^-g^-s^-$ | -170.3     | -80.5     | 56.1   | 179.3    | -8.7     | -15.1    | 32.5     | -37.3    | 29.1     | -59.8   | -49.6   | -115.6  | 1.5                    |
| $\alpha_{\text{L}}[\text{u}]s^-g^+t$   | -169.7     | -89.7     | -3.5   | 176.5    | -13.5    | -9.2     | 27.4     | -35.4    | 30.7     | -92.4   | 61.2    | 156.5   | 2.1                    |
| $\alpha_{\text{L}}[\text{u}]g^+g^-t$   | -170.2     | -73.1     | -20.2  | 179.0    | 9.7      | -30.7    | 40.2     | -34.5    | 15.5     | 39.5    | -77.7   | -173.8  | 3.0                    |
| $\alpha_{\text{L}}[\text{u}]g^-tg^-$   | -169.9     | -76.5     | -16.0  | 177.2    | 3.0      | -24.6    | 36.8     | -35.1    | 20.0     | -88.4   | 155.2   | -86.1   | 3.5                    |
| $\gamma_{\text{L}}[\text{u}]s^-tg^-$   | -169.4     | -73.5     | 44.0   | 177.3    | 3.2      | -26.6    | 39.6     | -37.4    | 21.5     | -126.2  | 157.4   | -87.1   | 3.7                    |
| $\alpha_{\text{L}}[\text{u}]g^+tg^+$   | -169.9     | -72.3     | -17.7  | 178.0    | 11.5     | -32.6    | 41.3     | -34.4    | 14.3     | 52.8    | -159.1  | 88.0    | 5.0                    |
| $\gamma_{\text{L}}[\text{u}]tg^+g^+$   | -169.8     | -76.6     | 53.3   | 177.1    | 0.1      | -23.6    | 37.7     | -37.2    | 23.5     | -167.7  | 51.1    | 64.1    | 5.4                    |
| $\delta_{\text{L}}[{}^a]g^-g^+t$       | -177.6     | -122.4    | 17.2   | 174.7    | -36.8    | 40.9     | -31.2    | 10.0     | 16.6     | -59.1   | 81.9    | 177.8   | 7.0                    |
| $\gamma_{\text{L}}[\text{u}]g^-g^+s^-$ | -171.9     | -81.5     | 75.6   | -163.6   | -7.1     | -17.0    | 33.7     | -37.2    | 27.9     | -74.5   | 68.7    | -147.1  | 10.4                   |
| $\gamma_{\text{L}}[{}^a]g^+g^-t$       | 179.0      | -113.3    | 88.4   | -175.7   | -35.3    | 15.4     | 8.4      | -28.9    | 40.3     | 70.9    | -64.7   | -166.6  | 10.4                   |
| $\gamma_{\text{L}}[{}^a]g^+g^-g^-$     | 173.3      | -92.3     | 75.2   | -176.5   | -34.2    | 16.8     | 4.8      | -24.7    | 37.2     | 65.2    | -61.4   | -85.4   | 10.6                   |
| $\gamma_{\text{L}}[\text{u}]g^-tt$     | -171.1     | -79.0     | 49.1   | 177.9    | -6.5     | -17.6    | 34.3     | -37.8    | 28.0     | -69.4   | -175.2  | -175.4  | 10.6                   |
| $\gamma_{\text{L}}[\text{u}]ttt$       | -171.9     | -78.5     | 57.2   | 178.0    | -2.5     | -21.3    | 36.3     | -37.3    | 25.2     | -164.1  | 173.7   | 172.8   | 14.5                   |
| $\varepsilon_{\text{L}}[{}^a]g^+ts^+$  | 173.3      | -108.1    | 179.8  | -178.0   | -39.7    | 24.2     | -2.1     | -20.5    | 38.0     | 59.5    | -151.5  | 96.3    | 15.1                   |
| $\gamma_{\text{L}}[\text{u}]tts^+$     | -172.1     | -78.5     | 57.4   | 178.1    | -2.0     | -21.9    | 36.8     | -37.4    | 25.0     | -162.7  | 166.5   | 91.1    | 15.3                   |
| $\gamma_{\text{L}}[{}^a]g^+g^+s^-$     | -179.5     | -99.4     | 74.5   | -176.4   | -23.2    | -1.9     | 24.7     | -38.0    | 38.6     | 37.9    | 67.3    | -143.0  | 15.8                   |
| $\gamma_{\text{L}}[\text{u}]g^+tg^-$   | -172.8     | -79.6     | 57.7   | 178.7    | -4.1     | -20.5    | 36.6     | -38.5    | 27.1     | 65.0    | -171.1  | -80.5   | 18.3                   |
| $\gamma_{\text{L}}[\text{d}]s^-g^-s^-$ | -173.5     | -83.5     | 67.1   | -179.1   | -13.5    | 30.7     | -37.7    | 28.9     | -9.3     | -140.8  | -57.7   | -96.9   | 19.0                   |
| $\varepsilon_{\text{L}}[{}^a]tg^-t$    | 166.3      | -80.7     | 179.7  | -176.0   | -31.9    | 41.6     | -34.7    | 15.5     | 10.0     | -175.0  | -80.0   | -169.4  | 25.3                   |

<sup>a</sup> Different envelope or twisted (half-chair) conformations with one or two atoms of the five-membered ring other than the  $\gamma$  carbon deviating out of the ring plane.

**Table SI2.** Dihedral angles (in degrees; see Figure 2 for definition) and relative energy ( $\Delta E^{\text{sp}}$ ; in kcal/mol) of the minimum energy conformations characterized for Ac-*c*-( $\beta$ Pro)Arg-NHMe in the gas phase at the B3LYP/6-31+G(d,p) level.

| Conformation                                          | $\omega_0$ | $\varphi$ | $\psi$ | $\omega$ | $\chi^0$ | $\chi^1$ | $\chi^2$ | $\chi^3$ | $\chi^4$ | $\xi^1$ | $\xi^2$ | $\xi^3$ | $\Delta E^{\text{sp}}$ |
|-------------------------------------------------------|------------|-----------|--------|----------|----------|----------|----------|----------|----------|---------|---------|---------|------------------------|
| $\alpha_L[\text{d}]\text{g}^+\text{g}^-\text{t}$      | -169.7     | -86.3     | -11.6  | 175.3    | -12.4    | 31.7     | -39.6    | 32.0     | -12.2    | 75.3    | -71.4   | 178.9   | 0.0                    |
| $\alpha_L[\text{d}]\text{g}^+\text{ts}^+$             | -169.2     | -90.1     | -4.3   | 174.5    | -14.8    | 33.5     | -40.1    | 31.0     | -10.0    | 69.2    | -172.0  | 95.2    | 1.3                    |
| $\gamma_L[\text{d}]\text{s}^-\text{g}^+\text{t}$      | -171.1     | -84.1     | 75.5   | -176.7   | -18.1    | 35.0     | -39.5    | 28.3     | -6.3     | -116.3  | 70.4    | 164.2   | 2.0                    |
| $\gamma_L[\text{d}]\text{s}^-\text{ts}^-$             | -170.3     | -83.1     | 66.4   | -178.5   | -16.0    | 34.1     | -40.0    | 30.0     | -8.8     | -104.8  | 168.1   | -93.4   | 3.1                    |
| $\gamma_L[\text{u}]\text{s}^+\text{g}^-\text{t}$      | -168.7     | -66.8     | 31.8   | 174.5    | 8.9      | -32.1    | 43.4     | -38.2    | 18.1     | 127.7   | -65.4   | 178.3   | 3.9                    |
| $\gamma_L[\text{d}]\text{g}^-\text{g}^-\text{s}^+$    | -175.9     | -83.6     | 80.9   | -175.2   | -19.1    | 36.1     | -40.2    | 28.2     | -5.9     | -76.4   | -70.6   | 122.9   | 5.1                    |
| $\gamma_L[\text{u}]\text{s}^+\text{ts}^+$             | -169.1     | -73.5     | 47.9   | 174.7    | 4.1      | -28.8    | 42.7     | -40.4    | 22.6     | 112.6   | -170.4  | 92.2    | 5.4                    |
| $\varepsilon_L[\text{u}]\text{g}^-\text{g}^+\text{t}$ | -172.3     | -56.3     | 133.9  | -177.1   | 15.6     | -31.5    | 36.5     | -27.8    | 7.4      | -75.9   | 72.2    | 169.3   | 5.4                    |
| $\varepsilon_L[\text{u}]\text{g}^-\text{ct}$          | -162.4     | -79.9     | 169.9  | 175.2    | 16.6     | -39.5    | 45.7     | -36.8    | 12.7     | -71.3   | -7.3    | -165.5  | 5.5                    |
| $\alpha_L[\text{u}]\text{g}^+\text{g}^+\text{s}^-$    | -168.5     | -78.5     | -8.5   | 173.3    | 0.6      | -23.2    | 37.0     | -37.0    | 22.7     | 84.3    | 55.7    | -110.0  | 5.7                    |
| $\gamma_L[\text{u}]\text{s}^+\text{g}^+\text{s}^-$    | -168.5     | -64.1     | 20.3   | 174.8    | 11.9     | -33.8    | 43.6     | -36.7    | 15.3     | 97.7    | 54.4    | -107.7  | 6.0                    |
| $\gamma_L[\text{u}]\text{g}^-\text{tg}^-$             | -171.6     | -80.2     | 83.7   | -177.3   | -5.7     | -16.8    | 32.5     | -36.0    | 26.0     | -71.0   | 176.4   | -90.0   | 6.5                    |
| $\gamma_L[\text{u}]\text{g}^-\text{g}^-\text{s}^-$    | -173.4     | -84.8     | 82.6   | -173.7   | -22.4    | 37.8     | -40.5    | 26.8     | -2.6     | -52.0   | -53.1   | -108.5  | 7.3                    |
| $\gamma_L[\text{u}]\text{tg}^-\text{g}^-$             | -169.0     | -68.3     | 32.5   | -174.8   | 7.7      | -29.9    | 41.0     | -36.6    | 18.0     | 158.1   | -51.3   | -68.2   | 8.9                    |
| $\gamma_L[\text{u}]\text{ttt}$                        | -174.5     | -84.6     | 78.3   | -174.8   | -20.0    | 35.4     | -38.5    | 26.3     | -3.9     | 172.4   | 178.1   | -172.5  | 13.7                   |
| $\gamma_L[\text{u}]\text{g}^+\text{g}^+\text{t}$      | -173.4     | -85.4     | 67.9   | -175.6   | -20.0    | 35.5     | -38.9    | 26.6     | -4.0     | 45.5    | 61.0    | -158.6  | 13.8                   |
| $\gamma_L[\text{u}]\text{g}^+\text{g}^+\text{g}^+$    | -174.3     | -85.2     | 72.4   | -175.6   | -20.1    | 35.4     | -38.6    | 26.3     | -3.7     | 49.3    | 59.2    | 89.5    | 14.7                   |
| $\gamma_L[\text{u}]\text{tg}^-\text{t}$               | -175.7     | -84.3     | 80.0   | -174.7   | -21.5    | 36.0     | -38.0    | 25.0     | -2.0     | 175.4   | -66.9   | -166.9  | 15.4                   |
| $\gamma_L[\text{u}]\text{tg}^-\text{g}^-$             | -175.6     | -83.5     | 78.9   | -174.4   | -21.1    | 35.9     | -38.2    | 25.4     | -2.6     | 172.0   | -67.7   | -87.5   | 15.7                   |
| $\alpha_L[\text{d}]\text{ttc}$                        | -168.5     | -88.8     | 0.7    | 172.8    | -13.4    | 31.8     | -38.7    | 30.7     | -10.9    | 169.1   | 174.6   | 26.7    | 17.3                   |
| $\gamma_L[\text{u}]\text{ttc}$                        | -172.0     | -84.2     | 78.4   | -175.7   | -16.2    | -7.3     | 26.8     | -36.3    | 33.2     | 173.2   | 172.8   | 26.5    | 18.1                   |
| $\gamma_L[\text{u}]\text{g}^-\text{g}^+\text{t}$      | -166.3     | -60.7     | 3.5    | 172.2    | 12.7     | -29.0    | 33.4     | -25.1    | 7.5      | -69.9   | 71.5    | 175.0   | 18.8                   |
| $\alpha_L[\text{d}]\text{g}^-\text{g}^-\text{s}^-$    | -168.5     | -72.6     | -27.2  | 162.5    | -2.4     | 25.3     | -38.3    | 36.0     | -21.5    | -50.8   | -45.5   | -99.6   | 21.6                   |

<sup>a</sup> Envelope conformation with the  $\beta$  carbon deviating out of the ring plane.

Cartesian coordinates and relative energies of all the structures calculated for  
Ac-*t*-( $\beta$ Pro)Arg-NHMe

| $\gamma_L$ [u]s $^{-g}$ t | 0.0000000 |          |          |
|---------------------------|-----------|----------|----------|
| C                         | 0.00000   | 0.00000  | 0.00000  |
| H                         | 1.09000   | 0.00000  | 0.00000  |
| H                         | -0.36500  | 1.03100  | 0.00000  |
| H                         | -0.34500  | -0.48200 | 0.92200  |
| C                         | -0.46200  | -0.77200 | -1.21800 |
| O                         | 0.33900   | -1.43800 | -1.89000 |
| N                         | -1.78200  | -0.70500 | -1.57000 |
| C                         | -2.85800  | -0.15100 | -0.72100 |
| H                         | -2.51300  | -0.00900 | 0.30200  |
| H                         | -3.18800  | 0.82100  | -1.10900 |
| C                         | -3.96000  | -1.20400 | -0.84100 |
| H                         | -4.94700  | -0.81500 | -0.57500 |
| H                         | -3.73800  | -2.05300 | -0.18300 |
| C                         | -3.86600  | -1.62600 | -2.31800 |
| H                         | -4.30600  | -0.81400 | -2.90900 |
| C                         | -4.57800  | -2.95900 | -2.67400 |
| H                         | -3.88000  | -3.65200 | -3.15900 |
| H                         | -4.91700  | -3.45700 | -1.76000 |
| C                         | -5.79700  | -2.79300 | -3.59200 |
| H                         | -6.25200  | -3.77400 | -3.77600 |
| H                         | -6.55000  | -2.14900 | -3.11600 |
| N                         | -5.36200  | -2.20200 | -4.86100 |
| H                         | -4.42000  | -1.74600 | -4.85700 |
| C                         | -6.02300  | -2.18900 | -6.00400 |
| N                         | -7.29100  | -2.63500 | -6.10300 |
| H                         | -7.72300  | -2.78400 | -7.00300 |
| H                         | -7.79700  | -2.94500 | -5.28900 |
| N                         | -5.40200  | -1.73100 | -7.11200 |
| H                         | -5.93000  | -1.45200 | -7.92500 |
| H                         | -4.45400  | -1.38300 | -7.03000 |
| C                         | -2.34000  | -1.61200 | -2.60500 |
| H                         | -1.89900  | -2.60600 | -2.44900 |
| C                         | -2.01600  | -1.21700 | -4.07200 |
| O                         | -2.92600  | -1.10300 | -4.93100 |
| N                         | -0.73300  | -1.06000 | -4.38000 |
| H                         | -0.05900  | -1.23000 | -3.62600 |
| C                         | -0.28000  | -0.72900 | -5.72700 |
| H                         | -0.77400  | 0.17800  | -6.08600 |
| H                         | 0.79700   | -0.56300 | -5.69500 |
| H                         | -0.49600  | -1.54400 | -6.42500 |

| $\gamma_L[\text{u}]\text{g}^-s^+$ | 1.1000000 |          |          |
|-----------------------------------|-----------|----------|----------|
| C                                 | 0.00000   | 0.00000  | 0.00000  |
| H                                 | 1.09000   | 0.00000  | 0.00000  |
| H                                 | -0.36400  | 1.03100  | 0.00000  |
| H                                 | -0.34600  | -0.48200 | 0.92100  |
| C                                 | -0.46200  | -0.76900 | -1.22000 |
| O                                 | 0.33800   | -1.42600 | -1.90100 |
| N                                 | -1.78500  | -0.71100 | -1.56200 |
| C                                 | -2.86600  | -0.16600 | -0.72100 |
| H                                 | -2.52000  | 0.00600  | 0.29700  |
| H                                 | -3.22200  | 0.78900  | -1.12800 |
| C                                 | -3.94100  | -1.24800 | -0.81600 |
| H                                 | -4.93900  | -0.88100 | -0.55800 |
| H                                 | -3.69700  | -2.07400 | -0.13700 |
| C                                 | -3.85000  | -1.71200 | -2.28300 |
| H                                 | -4.37700  | -0.97600 | -2.90100 |
| C                                 | -4.46600  | -3.10500 | -2.51300 |
| H                                 | -3.75100  | -3.87800 | -2.20500 |
| H                                 | -5.33300  | -3.22500 | -1.84900 |
| C                                 | -4.91900  | -3.42800 | -3.94600 |
| H                                 | -4.17700  | -3.12400 | -4.68600 |
| H                                 | -5.06400  | -4.50800 | -4.05200 |
| N                                 | -6.20600  | -2.79000 | -4.29200 |
| H                                 | -7.01700  | -3.13500 | -3.79500 |
| C                                 | -6.44600  | -1.88300 | -5.25100 |
| N                                 | -5.46800  | -1.17400 | -5.80200 |
| H                                 | -5.65200  | -0.63900 | -6.63800 |
| H                                 | -4.52000  | -1.10200 | -5.38100 |
| N                                 | -7.72500  | -1.68800 | -5.64200 |
| H                                 | -7.98000  | -0.88500 | -6.19600 |
| H                                 | -8.43800  | -2.38200 | -5.47500 |
| C                                 | -2.33400  | -1.60800 | -2.61100 |
| H                                 | -1.83700  | -2.58200 | -2.50200 |
| C                                 | -2.04800  | -1.12900 | -4.05700 |
| O                                 | -2.97000  | -0.92000 | -4.87600 |
| N                                 | -0.76500  | -0.99800 | -4.39000 |
| H                                 | -0.07800  | -1.21000 | -3.66000 |
| C                                 | -0.33700  | -0.57500 | -5.71900 |
| H                                 | 0.75200   | -0.51200 | -5.72500 |
| H                                 | -0.66000  | -1.29300 | -6.47900 |
| H                                 | -0.75700  | 0.40300  | -5.96800 |

| $\gamma_L[\text{u}]\text{g}^-s^-$ | 1.5000000 |          |          |
|-----------------------------------|-----------|----------|----------|
| C                                 | 0.00000   | 0.00000  | 0.00000  |
| H                                 | 1.08900   | 0.00000  | 0.00000  |
| H                                 | -0.36300  | 1.03200  | 0.00000  |
| H                                 | -0.35000  | -0.48100 | 0.92000  |
| C                                 | -0.46300  | -0.76100 | -1.22400 |
| O                                 | 0.34400   | -1.36600 | -1.94700 |
| N                                 | -1.79600  | -0.75900 | -1.52600 |
| C                                 | -2.87700  | -0.21400 | -0.68800 |
| H                                 | -2.52700  | -0.01700 | 0.32500  |
| H                                 | -3.24800  | 0.72900  | -1.11100 |
| C                                 | -3.93800  | -1.31100 | -0.75400 |
| H                                 | -4.94000  | -0.94800 | -0.50700 |
| H                                 | -3.68500  | -2.11300 | -0.04900 |
| C                                 | -3.84100  | -1.81700 | -2.20800 |
| H                                 | -4.40900  | -1.12600 | -2.83900 |
| C                                 | -4.43000  | -3.23000 | -2.36700 |
| H                                 | -3.90600  | -3.92400 | -1.69600 |
| H                                 | -5.47400  | -3.19800 | -2.03200 |
| C                                 | -4.38400  | -3.84800 | -3.77600 |
| H                                 | -3.35400  | -4.09600 | -4.05800 |
| H                                 | -4.93900  | -4.78900 | -3.77400 |
| N                                 | -4.90200  | -2.94000 | -4.80400 |
| H                                 | -4.30700  | -2.08900 | -4.91600 |
| C                                 | -5.96500  | -3.07500 | -5.57600 |
| N                                 | -6.70600  | -4.19900 | -5.61700 |
| H                                 | -7.60500  | -4.21000 | -6.07400 |
| H                                 | -6.42500  | -5.03400 | -5.13000 |
| N                                 | -6.34800  | -2.03500 | -6.35200 |
| H                                 | -6.93100  | -2.18800 | -7.16100 |
| H                                 | -5.80100  | -1.18400 | -6.34300 |
| C                                 | -2.33900  | -1.65200 | -2.57700 |
| H                                 | -1.79200  | -2.60300 | -2.51400 |
| C                                 | -2.13100  | -1.11000 | -4.02100 |
| O                                 | -3.09100  | -0.97300 | -4.81700 |
| N                                 | -0.87700  | -0.83700 | -4.37200 |
| H                                 | -0.15200  | -1.02500 | -3.67200 |
| C                                 | -0.52200  | -0.33700 | -5.69700 |
| H                                 | -1.06700  | 0.58500  | -5.91800 |
| H                                 | 0.54900   | -0.13600 | -5.71200 |
| H                                 | -0.76200  | -1.07400 | -6.46900 |

| $\alpha_L[\mathbf{u}]s^{-g^+t}$ | 2.1000000 |          |          |
|---------------------------------|-----------|----------|----------|
| C                               | 0.00000   | 0.00000  | 0.00000  |
| H                               | 1.09000   | 0.00000  | 0.00000  |
| H                               | -0.36500  | 1.03200  | 0.00000  |
| H                               | -0.34700  | -0.47800 | 0.92300  |
| C                               | -0.46400  | -0.77700 | -1.21500 |
| O                               | 0.30700   | -1.43100 | -1.91100 |
| N                               | -1.80900  | -0.71000 | -1.55100 |
| C                               | -2.90500  | -0.21000 | -0.70400 |
| H                               | -2.54900  | 0.04200  | 0.29400  |
| H                               | -3.34800  | 0.69300  | -1.14500 |
| C                               | -3.89400  | -1.37500 | -0.71100 |
| H                               | -4.91700  | -1.07300 | -0.46900 |
| H                               | -3.57900  | -2.12000 | 0.03000  |
| C                               | -3.79100  | -1.98200 | -2.13300 |
| H                               | -4.49700  | -1.45800 | -2.79100 |
| C                               | -4.14600  | -3.49200 | -2.10000 |
| H                               | -3.26100  | -4.06800 | -1.80300 |
| H                               | -4.88800  | -3.64100 | -1.30800 |
| C                               | -4.76900  | -4.12200 | -3.35500 |
| H                               | -4.97800  | -5.17300 | -3.12600 |
| H                               | -5.72600  | -3.63400 | -3.58600 |
| N                               | -3.88100  | -4.03300 | -4.51300 |
| H                               | -3.34400  | -3.13900 | -4.62100 |
| C                               | -3.88400  | -4.80600 | -5.58900 |
| N                               | -4.60900  | -5.93900 | -5.66700 |
| H                               | -4.62200  | -6.49600 | -6.50700 |
| H                               | -5.19300  | -6.23900 | -4.90400 |
| N                               | -3.12700  | -4.43900 | -6.64200 |
| H                               | -2.97000  | -5.05400 | -7.42400 |
| H                               | -2.58700  | -3.58400 | -6.58900 |
| C                               | -2.32000  | -1.62900 | -2.57600 |
| H                               | -1.68100  | -2.51800 | -2.58500 |
| C                               | -2.22900  | -1.06300 | -4.00000 |
| O                               | -2.57500  | -1.77300 | -4.97400 |
| N                               | -1.78300  | 0.18300  | -4.15400 |
| H                               | -1.44900  | 0.64800  | -3.32000 |
| C                               | -1.57900  | 0.81000  | -5.45700 |
| H                               | -1.57000  | 1.89300  | -5.32800 |
| H                               | -0.63100  | 0.49100  | -5.90100 |
| H                               | -2.39400  | 0.53100  | -6.12600 |



| $\alpha_L[u]g^+g^-t$ | 3.0000000 |          |          |
|----------------------|-----------|----------|----------|
| C                    | 0.00000   | 0.00000  | 0.00000  |
| H                    | 1.09000   | 0.00000  | 0.00000  |
| H                    | -0.37000  | 1.02900  | 0.00000  |
| H                    | -0.34000  | -0.48000 | 0.92500  |
| C                    | -0.47000  | -0.78900 | -1.20400 |
| O                    | 0.26600   | -1.55700 | -1.81900 |
| N                    | -1.77800  | -0.60500 | -1.62500 |
| C                    | -2.87600  | -0.06100 | -0.79000 |
| H                    | -2.59900  | -0.05500 | 0.26500  |
| H                    | -3.11000  | 0.96900  | -1.08600 |
| C                    | -4.04800  | -1.00200 | -1.09400 |
| H                    | -5.02000  | -0.53400 | -0.91300 |
| H                    | -3.98200  | -1.90000 | -0.46700 |
| C                    | -3.83400  | -1.35500 | -2.57700 |
| H                    | -4.09000  | -0.46100 | -3.16100 |
| C                    | -4.71300  | -2.50000 | -3.13300 |
| H                    | -5.71600  | -2.37800 | -2.71000 |
| H                    | -4.82900  | -2.38400 | -4.21600 |
| C                    | -4.27100  | -3.95000 | -2.86700 |
| H                    | -3.95600  | -4.08300 | -1.82200 |
| H                    | -5.12800  | -4.61100 | -3.04700 |
| N                    | -3.17900  | -4.31200 | -3.77800 |
| H                    | -2.70700  | -3.52500 | -4.28800 |
| C                    | -2.63400  | -5.51100 | -3.90900 |
| N                    | -3.06600  | -6.57100 | -3.19900 |
| H                    | -2.73800  | -7.50300 | -3.40200 |
| H                    | -3.85500  | -6.48900 | -2.57600 |
| N                    | -1.62500  | -5.67600 | -4.78800 |
| H                    | -1.06700  | -6.51600 | -4.79000 |
| H                    | -1.23600  | -4.86200 | -5.24700 |
| C                    | -2.28900  | -1.52900 | -2.64700 |
| H                    | -1.99000  | -2.54700 | -2.37100 |
| C                    | -1.74700  | -1.32100 | -4.06200 |
| O                    | -1.88700  | -2.24300 | -4.90000 |
| N                    | -1.21400  | -0.13800 | -4.36800 |
| H                    | -1.06100  | 0.50300  | -3.60000 |
| C                    | -0.64400  | 0.17800  | -5.67600 |
| H                    | -0.73000  | 1.25100  | -5.85200 |
| H                    | 0.41000   | -0.11400 | -5.72400 |
| H                    | -1.19700  | -0.36200 | -6.44500 |

| $\alpha_L[\text{u}]\text{g}^{-1}\text{g}^{-1}$ | 3.5000000 |          |          |
|------------------------------------------------|-----------|----------|----------|
| C                                              | 0.00000   | 0.00000  | 0.00000  |
| H                                              | 1.09000   | 0.00000  | 0.00000  |
| H                                              | -0.36800  | 1.03000  | 0.00000  |
| H                                              | -0.34200  | -0.47900 | 0.92500  |
| C                                              | -0.46700  | -0.78700 | -1.20700 |
| O                                              | 0.28200   | -1.52100 | -1.84600 |
| N                                              | -1.78700  | -0.63900 | -1.60400 |
| C                                              | -2.88000  | -0.08500 | -0.77600 |
| H                                              | -2.57900  | -0.00400 | 0.26800  |
| H                                              | -3.16100  | 0.91600  | -1.12700 |
| C                                              | -4.01800  | -1.08600 | -0.99000 |
| H                                              | -5.00400  | -0.65600 | -0.79300 |
| H                                              | -3.88600  | -1.94900 | -0.32500 |
| C                                              | -3.85100  | -1.52500 | -2.45800 |
| H                                              | -4.25400  | -0.72700 | -3.09800 |
| C                                              | -4.56600  | -2.85200 | -2.78600 |
| H                                              | -3.92100  | -3.68800 | -2.49100 |
| H                                              | -5.47200  | -2.93300 | -2.17400 |
| C                                              | -4.95800  | -3.00400 | -4.27300 |
| H                                              | -5.92200  | -2.52800 | -4.47000 |
| H                                              | -4.23100  | -2.52300 | -4.92600 |
| N                                              | -5.08800  | -4.40700 | -4.69700 |
| H                                              | -5.96600  | -4.87200 | -4.50900 |
| C                                              | -4.07400  | -5.17400 | -5.12900 |
| N                                              | -2.84200  | -4.69200 | -5.25200 |
| H                                              | -2.12400  | -5.27100 | -5.66300 |
| H                                              | -2.57100  | -3.70900 | -5.03600 |
| N                                              | -4.32500  | -6.47000 | -5.42600 |
| H                                              | -3.59500  | -7.06700 | -5.78500 |
| H                                              | -5.26900  | -6.81800 | -5.49500 |
| C                                              | -2.29800  | -1.56600 | -2.62500 |
| H                                              | -1.91600  | -2.57200 | -2.41500 |
| C                                              | -1.84400  | -1.26200 | -4.05500 |
| O                                              | -2.01700  | -2.11700 | -4.95000 |
| N                                              | -1.32900  | -0.05500 | -4.30500 |
| H                                              | -1.13700  | 0.52900  | -3.50200 |
| C                                              | -0.80300  | 0.34000  | -5.60900 |
| H                                              | -0.84300  | 1.42700  | -5.69300 |
| H                                              | 0.23200   | 0.00500  | -5.73200 |
| H                                              | -1.41400  | -0.10800 | -6.39400 |

| $\gamma_L[u]s^{-tg}$ | 3.7000000 |          |          |
|----------------------|-----------|----------|----------|
| C                    | 0.00000   | 0.00000  | 0.00000  |
| H                    | 1.09000   | 0.00000  | 0.00000  |
| H                    | -0.36500  | 1.03100  | 0.00000  |
| H                    | -0.34600  | -0.48200 | 0.92200  |
| C                    | -0.46200  | -0.77300 | -1.21700 |
| O                    | 0.33800   | -1.44600 | -1.88500 |
| N                    | -1.78100  | -0.70100 | -1.57100 |
| C                    | -2.84500  | -0.11500 | -0.72300 |
| H                    | -2.51700  | -0.03300 | 0.31300  |
| H                    | -3.10700  | 0.88900  | -1.08100 |
| C                    | -4.01000  | -1.09100 | -0.90500 |
| H                    | -4.97500  | -0.63900 | -0.65800 |
| H                    | -3.86900  | -1.96900 | -0.26400 |
| C                    | -3.88800  | -1.47300 | -2.38600 |
| H                    | -4.20900  | -0.60400 | -2.97400 |
| C                    | -4.68800  | -2.70700 | -2.86400 |
| H                    | -4.01600  | -3.41000 | -3.36700 |
| H                    | -5.11100  | -3.24700 | -2.00900 |
| C                    | -5.81100  | -2.32300 | -3.84700 |
| H                    | -6.70100  | -1.97000 | -3.32000 |
| H                    | -5.48000  | -1.51100 | -4.49800 |
| N                    | -6.24100  | -3.43200 | -4.71300 |
| H                    | -6.93700  | -4.07100 | -4.35500 |
| C                    | -5.66900  | -3.74500 | -5.88400 |
| N                    | -4.57200  | -3.12300 | -6.30900 |
| H                    | -4.26700  | -3.25400 | -7.26200 |
| H                    | -3.98900  | -2.50000 | -5.72100 |
| N                    | -6.23100  | -4.71200 | -6.64200 |
| H                    | -5.75900  | -5.07300 | -7.45700 |
| H                    | -7.17900  | -5.01700 | -6.48400 |
| C                    | -2.35900  | -1.60000 | -2.60000 |
| H                    | -2.01700  | -2.62400 | -2.38200 |
| C                    | -1.99700  | -1.33600 | -4.08300 |
| O                    | -2.88900  | -1.42500 | -4.95900 |
| N                    | -0.72700  | -1.06800 | -4.37600 |
| H                    | -0.05600  | -1.15900 | -3.60600 |
| C                    | -0.26200  | -0.86000 | -5.74300 |
| H                    | 0.73200   | -0.41200 | -5.70600 |
| H                    | -0.20500  | -1.80600 | -6.29300 |
| H                    | -0.94300  | -0.18900 | -6.27100 |

| $\alpha_L[\text{u}]g^+tg^+$ | 5.0000000 |          |          |
|-----------------------------|-----------|----------|----------|
| C                           | 0.00000   | 0.00000  | 0.00000  |
| H                           | 1.09000   | 0.00000  | 0.00000  |
| H                           | -0.37000  | 1.02900  | 0.00000  |
| H                           | -0.33900  | -0.48000 | 0.92600  |
| C                           | -0.46900  | -0.79100 | -1.20400 |
| O                           | 0.26600   | -1.56500 | -1.81100 |
| N                           | -1.77300  | -0.59700 | -1.63500 |
| C                           | -2.86800  | -0.04100 | -0.80300 |
| H                           | -2.60100  | -0.05200 | 0.25500  |
| H                           | -3.07900  | 0.99700  | -1.08900 |
| C                           | -4.06100  | -0.95400 | -1.12300 |
| H                           | -5.02200  | -0.46300 | -0.94500 |
| H                           | -4.01900  | -1.85700 | -0.50100 |
| C                           | -3.83000  | -1.29100 | -2.60600 |
| H                           | -4.03600  | -0.37500 | -3.17700 |
| C                           | -4.69000  | -2.39200 | -3.25000 |
| H                           | -5.74700  | -2.14300 | -3.09900 |
| H                           | -4.51800  | -2.35800 | -4.33100 |
| C                           | -4.42900  | -3.83000 | -2.76300 |
| H                           | -3.36600  | -4.01700 | -2.60000 |
| H                           | -4.93500  | -4.03500 | -1.81600 |
| N                           | -4.89500  | -4.84900 | -3.71700 |
| H                           | -5.85900  | -5.14800 | -3.65800 |
| C                           | -4.16700  | -5.34100 | -4.73200 |
| N                           | -3.00200  | -4.80400 | -5.08100 |
| H                           | -2.40900  | -5.30600 | -5.72700 |
| H                           | -2.69300  | -3.83400 | -4.85000 |
| N                           | -4.63800  | -6.42200 | -5.39300 |
| H                           | -4.23100  | -6.71200 | -6.26900 |
| H                           | -5.33800  | -7.02300 | -4.98400 |
| C                           | -2.29300  | -1.52200 | -2.65100 |
| H                           | -2.02500  | -2.54400 | -2.35900 |
| C                           | -1.75400  | -1.37500 | -4.07000 |
| O                           | -1.97200  | -2.29600 | -4.88600 |
| N                           | -1.14300  | -0.23500 | -4.40400 |
| H                           | -0.92700  | 0.40100  | -3.64700 |
| C                           | -0.54900  | 0.00600  | -5.71600 |
| H                           | -0.53400  | 1.08000  | -5.90700 |
| H                           | 0.47200   | -0.38500 | -5.76200 |
| H                           | -1.15200  | -0.49000 | -6.47700 |

| $\gamma_L[u]tg^+g^+$ | 5.4000000 |          |          |
|----------------------|-----------|----------|----------|
| C                    | 0.00000   | 0.00000  | 0.00000  |
| H                    | 1.08961   | 0.00000  | 0.00000  |
| H                    | -0.36516  | 1.03107  | 0.00000  |
| H                    | -0.34510  | -0.48225 | 0.92181  |
| C                    | -0.46244  | -0.77257 | -1.21739 |
| O                    | 0.33438   | -1.44513 | -1.88639 |
| N                    | -1.78281  | -0.70034 | -1.56983 |
| C                    | -2.85451  | -0.13352 | -0.72622 |
| H                    | -2.52149  | -0.02011 | 0.30499  |
| H                    | -3.15270  | 0.85474  | -1.09989 |
| C                    | -3.99216  | -1.14871 | -0.87891 |
| H                    | -4.96553  | -0.71669 | -0.62774 |
| H                    | -3.81896  | -2.00857 | -0.21985 |
| C                    | -3.87071  | -1.55924 | -2.35520 |
| H                    | -4.27247  | -0.74000 | -2.96233 |
| C                    | -4.55593  | -2.86435 | -2.77339 |
| H                    | -4.16171  | -3.19580 | -3.73792 |
| H                    | -4.30499  | -3.66052 | -2.06000 |
| C                    | -6.08644  | -2.82011 | -2.84066 |
| H                    | -6.45986  | -3.77262 | -3.23347 |
| H                    | -6.50095  | -2.69774 | -1.83715 |
| N                    | -6.69784  | -1.71233 | -3.62461 |
| H                    | -7.50141  | -1.28138 | -3.18726 |
| C                    | -6.59447  | -1.48199 | -4.94850 |
| N                    | -5.47195  | -1.72919 | -5.61707 |
| H                    | -5.49570  | -1.67240 | -6.62642 |
| H                    | -4.52549  | -1.61549 | -5.19046 |
| N                    | -7.66600  | -0.97372 | -5.59300 |
| H                    | -7.56704  | -0.52525 | -6.49219 |
| H                    | -8.59876  | -1.06127 | -5.21752 |
| C                    | -2.34556  | -1.60008 | -2.60587 |
| H                    | -1.94113  | -2.60810 | -2.43081 |
| C                    | -2.01689  | -1.25160 | -4.08101 |
| O                    | -2.92903  | -1.17929 | -4.93642 |
| N                    | -0.73415  | -1.09567 | -4.39746 |
| H                    | -0.05619  | -1.24651 | -3.64460 |
| C                    | -0.28981  | -0.82792 | -5.76159 |
| H                    | 0.78973   | -0.67663 | -5.74693 |
| H                    | -0.52765  | -1.66730 | -6.42234 |
| H                    | -0.77546  | 0.06922  | -6.15402 |

| $\delta_L [^\circ] g^-g^+t$ | 7.0000000 |          |          |
|-----------------------------|-----------|----------|----------|
| C                           | 0.00000   | 0.00000  | 0.00000  |
| H                           | 1.09075   | 0.00000  | 0.00000  |
| H                           | -0.37137  | 1.02678  | 0.00000  |
| H                           | -0.33069  | -0.48319 | 0.92746  |
| C                           | -0.47181  | -0.80051 | -1.19189 |
| O                           | 0.24459   | -1.70720 | -1.66886 |
| N                           | -1.69111  | -0.50283 | -1.72357 |
| C                           | -2.81581  | 0.09060  | -0.94632 |
| H                           | -2.62387  | -0.01807 | 0.12214  |
| H                           | -2.91806  | 1.15716  | -1.16592 |
| C                           | -4.06944  | -0.71167 | -1.41141 |
| H                           | -4.71118  | -0.08751 | -2.03831 |
| H                           | -4.66992  | -1.03970 | -0.55838 |
| C                           | -3.52186  | -1.89712 | -2.24562 |
| H                           | -4.20765  | -2.16184 | -3.05454 |
| C                           | -3.27136  | -3.14275 | -1.36736 |
| H                           | -2.70986  | -2.88048 | -0.45965 |
| H                           | -4.24606  | -3.49593 | -1.01433 |
| C                           | -2.57764  | -4.33847 | -2.04445 |
| H                           | -2.80732  | -5.25056 | -1.48082 |
| H                           | -2.95072  | -4.46229 | -3.06910 |
| N                           | -1.11717  | -4.14623 | -2.07747 |
| H                           | -0.74898  | -3.20524 | -1.91452 |
| C                           | -0.21320  | -4.99913 | -2.55209 |
| N                           | -0.52256  | -6.28627 | -2.78449 |
| H                           | 0.11009   | -6.89563 | -3.28053 |
| H                           | -1.40658  | -6.67190 | -2.49105 |
| N                           | 1.02522   | -4.54764 | -2.81218 |
| H                           | 1.80181   | -5.17933 | -2.93427 |
| H                           | 1.21324   | -3.55229 | -2.73450 |
| C                           | -2.24238  | -1.27137 | -2.85158 |
| H                           | -1.50044  | -1.98914 | -3.19394 |
| C                           | -2.58412  | -0.42919 | -4.10324 |
| O                           | -3.29884  | -0.92568 | -4.97027 |
| N                           | -2.03313  | 0.80377  | -4.18423 |
| H                           | -1.40118  | 1.09101  | -3.45063 |
| C                           | -2.18689  | 1.65061  | -5.36467 |
| H                           | -2.12599  | 2.69905  | -5.06670 |
| H                           | -1.41277  | 1.44153  | -6.11087 |
| H                           | -3.16170  | 1.45465  | -5.81254 |

| $\gamma_L[u]g^-g^+s^-$ | 10.4000000 |          |          |
|------------------------|------------|----------|----------|
| C                      | 0.00000    | 0.00000  | 0.00000  |
| H                      | 1.08970    | 0.00000  | 0.00000  |
| H                      | -0.36493   | 1.03113  | 0.00000  |
| H                      | -0.34555   | -0.48216 | 0.92168  |
| C                      | -0.46411   | -0.77217 | -1.21755 |
| O                      | 0.32704    | -1.45127 | -1.88663 |
| N                      | -1.78538   | -0.69828 | -1.56566 |
| C                      | -2.87480   | -0.13812 | -0.76071 |
| H                      | -2.55590   | 0.01447  | 0.27012  |
| H                      | -3.20116   | 0.82709  | -1.16818 |
| C                      | -3.95765   | -1.20082 | -0.89289 |
| H                      | -4.96052   | -0.82976 | -0.66223 |
| H                      | -3.72759   | -2.02554 | -0.20656 |
| C                      | -3.81077   | -1.66753 | -2.33404 |
| H                      | -4.30447   | -0.91933 | -2.96490 |
| C                      | -4.43031   | -3.03640 | -2.65136 |
| H                      | -3.81690   | -3.84295 | -2.22779 |
| H                      | -5.41961   | -3.09008 | -2.17647 |
| C                      | -4.59413   | -3.23771 | -4.16057 |
| H                      | -5.19501   | -4.13505 | -4.34455 |
| H                      | -5.11404   | -2.38560 | -4.60826 |
| N                      | -3.28206   | -3.37208 | -4.82641 |
| H                      | -2.55586   | -3.88559 | -4.34388 |
| C                      | -3.02845   | -2.94302 | -6.06203 |
| N                      | -4.01552   | -2.43718 | -6.81426 |
| H                      | -3.82369   | -1.97730 | -7.69175 |
| H                      | -4.97821   | -2.47423 | -6.50980 |
| N                      | -1.78137   | -3.00492 | -6.56406 |
| H                      | -1.59918   | -2.84020 | -7.54277 |
| H                      | -0.99203   | -3.24111 | -5.98164 |
| C                      | -2.30789   | -1.56685 | -2.62631 |
| H                      | -1.78828   | -2.53040 | -2.53303 |
| C                      | -2.06917   | -1.02146 | -4.06432 |
| O                      | -3.00184   | -0.57537 | -4.74360 |
| N                      | -0.79711   | -1.13608 | -4.50581 |
| H                      | -0.11666   | -1.37559 | -3.78126 |
| C                      | -0.31163   | -0.37935 | -5.65768 |
| H                      | -0.05696   | 0.64941  | -5.37790 |
| H                      | 0.57800    | -0.86909 | -6.05856 |
| H                      | -1.08587   | -0.34745 | -6.42499 |

| $\gamma_L[\text{a}]\text{g}^+\text{g}^-t$ | 10.4000000 |          |          |
|-------------------------------------------|------------|----------|----------|
| C                                         | 0.00000    | 0.00000  | 0.00000  |
| H                                         | 1.09045    | 0.00000  | 0.00000  |
| H                                         | -0.36407   | 1.02966  | 0.00000  |
| H                                         | -0.34071   | -0.48129 | 0.92458  |
| C                                         | -0.47133   | -0.77928 | -1.20650 |
| O                                         | 0.28617    | -1.60462 | -1.77579 |
| N                                         | -1.72969   | -0.58015 | -1.65577 |
| C                                         | -2.87739   | -0.04550 | -0.89548 |
| H                                         | -2.59132   | 0.19773  | 0.12720  |
| H                                         | -3.24975   | 0.85776  | -1.38679 |
| C                                         | -3.90256   | -1.19571 | -0.99232 |
| H                                         | -4.92753   | -0.81997 | -0.95998 |
| H                                         | -3.77473   | -1.87019 | -0.13865 |
| C                                         | -3.59507   | -1.91907 | -2.33958 |
| H                                         | -4.36937   | -1.64730 | -3.06091 |
| C                                         | -3.58104   | -3.46657 | -2.29232 |
| H                                         | -4.61097   | -3.80077 | -2.12019 |
| H                                         | -3.30665   | -3.84453 | -3.28496 |
| C                                         | -2.74182   | -4.20931 | -1.23682 |
| H                                         | -3.04644   | -3.92700 | -0.22131 |
| H                                         | -2.96055   | -5.27553 | -1.36029 |
| N                                         | -1.29051   | -4.00507 | -1.38294 |
| H                                         | -0.94769   | -3.13084 | -1.78223 |
| C                                         | -0.32987   | -4.71189 | -0.78143 |
| N                                         | -0.59376   | -5.89106 | -0.19097 |
| H                                         | 0.12718    | -6.40261 | 0.29459  |
| H                                         | -1.49013   | -6.33994 | -0.29237 |
| N                                         | 0.91646    | -4.21834 | -0.76631 |
| H                                         | 1.70476    | -4.78267 | -0.48895 |
| H                                         | 1.07404    | -3.26531 | -1.10072 |
| C                                         | -2.27142   | -1.27895 | -2.83863 |
| H                                         | -1.53926   | -1.99980 | -3.20259 |
| C                                         | -2.51425   | -0.22658 | -3.95305 |
| O                                         | -3.59310   | 0.34929  | -4.05993 |
| N                                         | -1.44916   | 0.00496  | -4.75810 |
| H                                         | -0.57562   | -0.46205 | -4.55712 |
| C                                         | -1.46942   | 1.02848  | -5.80110 |
| H                                         | -0.75043   | 0.76069  | -6.57725 |
| H                                         | -2.47031   | 1.07392  | -6.23195 |
| H                                         | -1.21796   | 2.01618  | -5.39965 |



| $\gamma_L [^{\circ}] g^+ g^-$ | 10.6000000 |          |          |
|-------------------------------|------------|----------|----------|
| C                             | 0.00000    | 0.00000  | 0.00000  |
| H                             | 1.08954    | 0.00000  | 0.00000  |
| H                             | -0.36333   | 1.03211  | 0.00000  |
| H                             | -0.35252   | -0.47463 | 0.92252  |
| C                             | -0.47422   | -0.74968 | -1.22446 |
| O                             | 0.33519    | -1.34120 | -1.97752 |
| N                             | -1.80100   | -0.78561 | -1.49014 |
| C                             | -2.91930   | -0.27332 | -0.67701 |
| H                             | -2.62191   | -0.14375 | 0.36369  |
| H                             | -3.24834   | 0.69487  | -1.07126 |
| C                             | -4.02671   | -1.30632 | -0.90809 |
| H                             | -5.04084   | -0.90472 | -0.85206 |
| H                             | -3.92236   | -2.03680 | -0.09783 |
| C                             | -3.71557   | -1.97433 | -2.29028 |
| H                             | -4.45557   | -1.60203 | -3.00347 |
| C                             | -3.76875   | -3.51801 | -2.35975 |
| H                             | -4.79203   | -3.84215 | -2.13246 |
| H                             | -3.57783   | -3.82588 | -3.39529 |
| C                             | -2.85559   | -4.33015 | -1.42025 |
| H                             | -3.06772   | -4.10761 | -0.37095 |
| H                             | -3.06825   | -5.39251 | -1.55520 |
| N                             | -1.41262   | -4.09856 | -1.61935 |
| H                             | -1.03151   | -3.28616 | -1.15048 |
| C                             | -0.57868   | -4.68332 | -2.48869 |
| N                             | -0.88202   | -5.86617 | -3.05363 |
| H                             | -0.31825   | -6.23830 | -3.80296 |
| H                             | -1.59577   | -6.46583 | -2.67036 |
| N                             | 0.56848    | -4.07003 | -2.79752 |
| H                             | 1.31886    | -4.57163 | -3.24927 |
| H                             | 0.71237    | -3.08385 | -2.54215 |
| C                             | -2.35097   | -1.36495 | -2.72959 |
| H                             | -1.65345   | -2.10494 | -3.12083 |
| C                             | -2.50045   | -0.24314 | -3.79822 |
| O                             | -3.59322   | 0.23592  | -4.08434 |
| N                             | -1.33021   | 0.14339  | -4.36068 |
| H                             | -0.46941   | -0.25544 | -4.00585 |
| C                             | -1.26107   | 1.23635  | -5.32843 |
| H                             | -0.32209   | 1.16033  | -5.87898 |
| H                             | -2.09778   | 1.15711  | -6.02431 |
| H                             | -1.31271   | 2.21368  | -4.83649 |

| $\gamma_L[u]g^{-tt}$ | 10.6000000 |          |          |
|----------------------|------------|----------|----------|
| C                    | 0.00000    | 0.00000  | 0.00000  |
| H                    | 1.08958    | 0.00000  | 0.00000  |
| H                    | -0.36328   | 1.03199  | 0.00000  |
| H                    | -0.34805   | -0.48108 | 0.92105  |
| C                    | -0.46210   | -0.76610 | -1.22276 |
| O                    | 0.34202    | -1.39516 | -1.92603 |
| N                    | -1.78986   | -0.73724 | -1.54172 |
| C                    | -2.86610   | -0.18056 | -0.70437 |
| H                    | -2.52217   | -0.01346 | 0.31583  |
| H                    | -3.21075   | 0.77906  | -1.11184 |
| C                    | -3.95661   | -1.24755 | -0.80416 |
| H                    | -4.94927   | -0.86159 | -0.55515 |
| H                    | -3.72915   | -2.07400 | -0.11889 |
| C                    | -3.85850   | -1.70906 | -2.26912 |
| H                    | -4.37644   | -0.97936 | -2.90125 |
| C                    | -4.49848   | -3.08636 | -2.51249 |
| H                    | -3.92827   | -3.86253 | -1.98417 |
| H                    | -5.50940   | -3.07351 | -2.08195 |
| C                    | -4.59856   | -3.43327 | -3.99862 |
| H                    | -5.11959   | -2.62978 | -4.52845 |
| H                    | -3.60388   | -3.52835 | -4.43988 |
| N                    | -5.31949   | -4.70796 | -4.20178 |
| H                    | -5.79852   | -5.11990 | -3.41154 |
| C                    | -5.46754   | -5.28296 | -5.39422 |
| N                    | -5.00478   | -4.67393 | -6.49485 |
| H                    | -4.98668   | -5.14526 | -7.38678 |
| H                    | -4.61634   | -3.74161 | -6.45353 |
| N                    | -6.07363   | -6.47973 | -5.50714 |
| H                    | -6.32057   | -6.86190 | -6.40761 |
| H                    | -6.32575   | -7.01953 | -4.69301 |
| C                    | -2.34276   | -1.61469 | -2.60145 |
| H                    | -1.84747   | -2.59274 | -2.50801 |
| C                    | -2.10554   | -1.14118 | -4.06426 |
| O                    | -3.04031   | -1.15137 | -4.88133 |
| N                    | -0.85060   | -0.79046 | -4.38185 |
| H                    | -0.13015   | -0.95136 | -3.67666 |
| C                    | -0.48285   | -0.37179 | -5.72874 |
| H                    | 0.50726    | 0.08481  | -5.69282 |
| H                    | -0.45871   | -1.22086 | -6.42161 |
| H                    | -1.20468   | 0.35650  | -6.10470 |

| $\gamma_L[u]_{ttt}$ | 14.5000000 |          |          |
|---------------------|------------|----------|----------|
| C                   | 0.00000    | 0.00000  | 0.00000  |
| H                   | 1.08967    | 0.00000  | 0.00000  |
| H                   | -0.36425   | 1.03157  | 0.00000  |
| H                   | -0.34563   | -0.48150 | 0.92207  |
| C                   | -0.46262   | -0.77061 | -1.22042 |
| O                   | 0.33365    | -1.43498 | -1.89687 |
| N                   | -1.78493   | -0.70444 | -1.56234 |
| C                   | -2.86051   | -0.14887 | -0.72129 |
| H                   | -2.53388   | -0.03900 | 0.31271  |
| H                   | -3.16659   | 0.83887  | -1.09045 |
| C                   | -3.98981   | -1.17228 | -0.88657 |
| H                   | -4.96667   | -0.74733 | -0.63409 |
| H                   | -3.81073   | -2.03285 | -0.22900 |
| C                   | -3.86034   | -1.57341 | -2.36488 |
| H                   | -4.28243   | -0.77906 | -2.99095 |
| C                   | -4.51454   | -2.89339 | -2.79169 |
| H                   | -4.12217   | -3.15646 | -3.78163 |
| H                   | -4.25119   | -3.69691 | -2.09098 |
| C                   | -6.03663   | -2.77763 | -2.90152 |
| H                   | -6.49173   | -2.60609 | -1.91970 |
| H                   | -6.28594   | -1.94046 | -3.56620 |
| N                   | -6.59494   | -4.02756 | -3.45898 |
| H                   | -5.93696   | -4.66286 | -3.89355 |
| C                   | -7.89007   | -4.31935 | -3.56175 |
| N                   | -8.81931   | -3.40657 | -3.24339 |
| H                   | -9.79413   | -3.65538 | -3.16333 |
| H                   | -8.57288   | -2.43855 | -3.10228 |
| N                   | -8.28145   | -5.54086 | -3.96700 |
| H                   | -9.23240   | -5.71969 | -4.25410 |
| H                   | -7.62168   | -6.29934 | -4.05769 |
| C                   | -2.33748   | -1.56921 | -2.63084 |
| H                   | -1.89921   | -2.57037 | -2.50884 |
| C                   | -2.05672   | -1.12443 | -4.09758 |
| O                   | -2.99666   | -0.97384 | -4.88894 |
| N                   | -0.76601   | -0.98116 | -4.43693 |
| H                   | -0.06887   | -1.18181 | -3.72044 |
| C                   | -0.36398   | -0.61169 | -5.78857 |
| H                   | 0.71501    | -0.45206 | -5.79695 |
| H                   | -0.61700   | -1.39976 | -6.50551 |
| H                   | -0.86832   | 0.30651  | -6.10143 |

| $\epsilon_L[\text{Å}]g^+ts^+$ | 15.1000000 |          |          |
|-------------------------------|------------|----------|----------|
| C                             | 0.00000    | 0.00000  | 0.00000  |
| H                             | 1.09004    | 0.00000  | 0.00000  |
| H                             | -0.37005   | 1.02790  | 0.00000  |
| H                             | -0.33959   | -0.48698 | 0.92215  |
| C                             | -0.46829   | -0.77135 | -1.21188 |
| O                             | 0.30732    | -1.55050 | -1.81081 |
| N                             | -1.75100   | -0.61679 | -1.61185 |
| C                             | -2.88366   | -0.09519 | -0.83035 |
| H                             | -2.61686   | 0.00568  | 0.22151  |
| H                             | -3.17293   | 0.88493  | -1.21968 |
| C                             | -3.98605   | -1.15890 | -1.07568 |
| H                             | -4.96888   | -0.69238 | -1.17456 |
| H                             | -4.04577   | -1.84783 | -0.22718 |
| C                             | -3.57595   | -1.91586 | -2.38223 |
| H                             | -4.35841   | -1.79546 | -3.13671 |
| C                             | -3.34831   | -3.43761 | -2.21924 |
| H                             | -4.29378   | -3.92219 | -1.94787 |
| H                             | -3.06285   | -3.84524 | -3.19717 |
| C                             | -2.25633   | -3.82765 | -1.19409 |
| H                             | -1.48003   | -3.06887 | -1.12969 |
| H                             | -2.67205   | -3.92534 | -0.18821 |
| N                             | -1.59697   | -5.10742 | -1.50097 |
| H                             | -2.09141   | -5.95079 | -1.24365 |
| C                             | -0.43653   | -5.26565 | -2.15626 |
| N                             | 0.32943    | -4.23588 | -2.50916 |
| H                             | 1.18258    | -4.41525 | -3.01953 |
| H                             | 0.19414    | -3.24948 | -2.21426 |
| N                             | -0.04840   | -6.51875 | -2.48324 |
| H                             | 0.88864    | -6.70186 | -2.80877 |
| H                             | -0.61710   | -7.32200 | -2.26340 |
| C                             | -2.27535   | -1.19703 | -2.84601 |
| H                             | -1.54303   | -1.88923 | -3.26761 |
| C                             | -2.51367   | -0.06706 | -3.88755 |
| O                             | -2.29536   | 1.10830  | -3.62341 |
| N                             | -3.00756   | -0.48179 | -5.08428 |
| H                             | -3.04731   | -1.47003 | -5.28790 |
| C                             | -3.24334   | 0.45727  | -6.18099 |
| H                             | -3.86879   | -0.02840 | -6.93171 |
| H                             | -3.75846   | 1.33907  | -5.79685 |
| H                             | -2.30419   | 0.77999  | -6.64243 |

| $\gamma_L[u]tts^+$ | 15.3000000 |          |          |
|--------------------|------------|----------|----------|
| C                  | 0.00000    | 0.00000  | 0.00000  |
| H                  | 1.08968    | 0.00000  | 0.00000  |
| H                  | -0.36448   | 1.03140  | 0.00000  |
| H                  | -0.34500   | -0.48168 | 0.92227  |
| C                  | -0.46266   | -0.77172 | -1.21965 |
| O                  | 0.33115    | -1.44620 | -1.88872 |
| N                  | -1.78239   | -0.69468 | -1.56976 |
| C                  | -2.85846   | -0.13619 | -0.73128 |
| H                  | -2.53492   | -0.03074 | 0.30415  |
| H                  | -3.15978   | 0.85343  | -1.09882 |
| C                  | -3.99384   | -1.15300 | -0.90461 |
| H                  | -4.96958   | -0.72447 | -0.65432 |
| H                  | -3.81867   | -2.01820 | -0.25103 |
| C                  | -3.85823   | -1.54392 | -2.38515 |
| H                  | -4.26419   | -0.73470 | -3.00311 |
| C                  | -4.53271   | -2.84469 | -2.84065 |
| H                  | -4.12827   | -3.11224 | -3.82252 |
| H                  | -4.28584   | -3.66531 | -2.15112 |
| C                  | -6.05268   | -2.68723 | -2.98898 |
| H                  | -6.56716   | -2.57396 | -2.02956 |
| H                  | -6.27159   | -1.78926 | -3.57267 |
| N                  | -6.68690   | -3.80530 | -3.71955 |
| H                  | -6.66365   | -3.74986 | -4.73037 |
| C                  | -7.19033   | -4.91822 | -3.19031 |
| N                  | -7.01206   | -5.21010 | -1.89284 |
| H                  | -7.56231   | -5.92350 | -1.43792 |
| H                  | -6.31947   | -4.72967 | -1.33910 |
| N                  | -7.90737   | -5.76292 | -3.95373 |
| H                  | -8.08988   | -6.71075 | -3.65837 |
| H                  | -8.24293   | -5.48904 | -4.86565 |
| C                  | -2.33449   | -1.55643 | -2.64075 |
| H                  | -1.90616   | -2.56147 | -2.51493 |
| C                  | -2.04138   | -1.11749 | -4.10690 |
| O                  | -2.97546   | -0.95797 | -4.90354 |
| N                  | -0.74763   | -0.98913 | -4.44051 |
| H                  | -0.05546   | -1.19585 | -3.72115 |
| C                  | -0.33571   | -0.62448 | -5.79068 |
| H                  | 0.74475    | -0.47499 | -5.79410 |
| H                  | -0.59283   | -1.41053 | -6.50836 |
| H                  | -0.82995   | 0.29818  | -6.10630 |

| $\gamma_L [^\circ] g^+ g^+ s^-$ | 15.8000000 |          |          |
|---------------------------------|------------|----------|----------|
| C                               | 0.00000    | 0.00000  | 0.00000  |
| H                               | 1.09017    | 0.00000  | 0.00000  |
| H                               | -0.36586   | 1.02959  | 0.00000  |
| H                               | -0.34232   | -0.48017 | 0.92460  |
| C                               | -0.47018   | -0.77564 | -1.21075 |
| O                               | 0.30447    | -1.55353 | -1.81639 |
| N                               | -1.74398   | -0.60936 | -1.63324 |
| C                               | -2.88830   | -0.11459 | -0.84518 |
| H                               | -2.59191   | 0.12520  | 0.17550  |
| H                               | -3.29828   | 0.78697  | -1.31378 |
| C                               | -3.86471   | -1.29554 | -0.95015 |
| H                               | -4.89825   | -1.00301 | -0.74549 |
| H                               | -3.58001   | -2.06199 | -0.21924 |
| C                               | -3.68052   | -1.80012 | -2.40543 |
| H                               | -4.36878   | -1.23578 | -3.04264 |
| C                               | -3.98043   | -3.29718 | -2.65076 |
| H                               | -4.88484   | -3.57303 | -2.09208 |
| H                               | -4.24555   | -3.43001 | -3.70667 |
| C                               | -2.88673   | -4.34402 | -2.39199 |
| H                               | -3.25277   | -5.31694 | -2.74145 |
| H                               | -1.97894   | -4.13312 | -2.95657 |
| N                               | -2.50076   | -4.50972 | -0.96885 |
| H                               | -3.25567   | -4.77658 | -0.34789 |
| C                               | -1.26459   | -4.74430 | -0.49830 |
| N                               | -0.17566   | -4.24408 | -1.08953 |
| H                               | 0.73063    | -4.58437 | -0.79856 |
| H                               | -0.15740   | -3.32679 | -1.56279 |
| N                               | -1.12778   | -5.50080 | 0.60982  |
| H                               | -0.27228   | -5.48949 | 1.14619  |
| H                               | -1.84662   | -6.14855 | 0.89809  |
| C                               | -2.25526   | -1.35122 | -2.80317 |
| H                               | -1.57339   | -2.18009 | -2.98884 |
| C                               | -2.22656   | -0.44589 | -4.06537 |
| O                               | -3.25006   | 0.03643  | -4.54094 |
| N                               | -0.98723   | -0.25317 | -4.57683 |
| H                               | -0.19474   | -0.63866 | -4.07804 |
| C                               | -0.74678   | 0.62972  | -5.71571 |
| H                               | 0.21838    | 0.37901  | -6.15875 |
| H                               | -1.53493   | 0.48619  | -6.45657 |
| H                               | -0.74320   | 1.68303  | -5.41491 |

| $\gamma_L[\text{u}]\text{g}^+\text{t}\text{g}^-$ | 18.3000000 |          |          |
|--------------------------------------------------|------------|----------|----------|
| C                                                | 0.00000    | 0.00000  | 0.00000  |
| H                                                | 1.08970    | 0.00000  | 0.00000  |
| H                                                | -0.36400   | 1.03158  | 0.00000  |
| H                                                | -0.34566   | -0.48098 | 0.92238  |
| C                                                | -0.46304   | -0.76925 | -1.22067 |
| O                                                | 0.33176    | -1.43467 | -1.89909 |
| N                                                | -1.78480   | -0.70313 | -1.56300 |
| C                                                | -2.86695   | -0.15744 | -0.72408 |
| H                                                | -2.53676   | -0.02652 | 0.30617  |
| H                                                | -3.19587   | 0.81742  | -1.10668 |
| C                                                | -3.97536   | -1.20508 | -0.87680 |
| H                                                | -4.96350   | -0.80762 | -0.62435 |
| H                                                | -3.76415   | -2.05051 | -0.20902 |
| C                                                | -3.85264   | -1.58947 | -2.36196 |
| H                                                | -4.28914   | -0.78348 | -2.96082 |
| C                                                | -4.57043   | -2.86495 | -2.83657 |
| H                                                | -5.65262   | -2.70961 | -2.72624 |
| H                                                | -4.38930   | -2.96488 | -3.91257 |
| C                                                | -4.15166   | -4.16487 | -2.13140 |
| H                                                | -3.06837   | -4.29814 | -2.16039 |
| H                                                | -4.43640   | -4.18110 | -1.07451 |
| N                                                | -4.71544   | -5.37703 | -2.76621 |
| H                                                | -4.16668   | -5.79429 | -3.50737 |
| C                                                | -5.94770   | -5.85650 | -2.59824 |
| N                                                | -6.84734   | -5.20671 | -1.84554 |
| H                                                | -7.70197   | -5.65501 | -1.55002 |
| H                                                | -6.70573   | -4.24610 | -1.57352 |
| N                                                | -6.29477   | -7.02875 | -3.15991 |
| H                                                | -7.26146   | -7.30976 | -3.23291 |
| H                                                | -5.60297   | -7.64383 | -3.56255 |
| C                                                | -2.33022   | -1.55342 | -2.64631 |
| H                                                | -1.85047   | -2.53810 | -2.55635 |
| C                                                | -2.06332   | -1.06165 | -4.10051 |
| O                                                | -3.00592   | -0.89501 | -4.88155 |
| N                                                | -0.77327   | -0.89633 | -4.43993 |
| H                                                | -0.06941   | -1.10728 | -3.73439 |
| C                                                | -0.38314   | -0.46752 | -5.77815 |
| H                                                | -0.65304   | -1.21886 | -6.52733 |
| H                                                | -0.88174   | 0.46887  | -6.04280 |
| H                                                | 0.69721    | -0.31793 | -5.79201 |

| $\gamma_L[d]s^{-g}s^{-}$ | 19.0000000 |          |          |
|--------------------------|------------|----------|----------|
| C                        | 0.00000    | 0.00000  | 0.00000  |
| H                        | 1.08958    | 0.00000  | 0.00000  |
| H                        | -0.36445   | 1.03134  | 0.00000  |
| H                        | -0.34692   | -0.48197 | 0.92112  |
| C                        | -0.46357   | -0.76776 | -1.21911 |
| O                        | 0.33425    | -1.41918 | -1.90881 |
| N                        | -1.78880   | -0.71273 | -1.56020 |
| C                        | -2.92606   | -0.42154 | -0.54034 |
| H                        | -2.65836   | -0.33685 | 0.51235  |
| H                        | -3.27479   | 0.56027  | -0.88525 |
| C                        | -4.15797   | -0.96445 | -1.23781 |
| H                        | -5.21503   | -0.68966 | -1.29402 |
| H                        | -3.97486   | -1.41450 | -0.25427 |
| C                        | -3.65910   | -2.10983 | -2.13669 |
| H                        | -4.38485   | -1.84745 | -2.91399 |
| C                        | -3.79641   | -3.60899 | -1.82156 |
| H                        | -2.99985   | -4.17015 | -2.32714 |
| H                        | -3.63933   | -3.74223 | -0.74425 |
| C                        | -5.13242   | -4.26954 | -2.21010 |
| H                        | -5.29294   | -4.21623 | -3.29251 |
| H                        | -5.09907   | -5.33141 | -1.95501 |
| N                        | -6.28499   | -3.62020 | -1.57478 |
| H                        | -6.59981   | -2.77097 | -2.09140 |
| C                        | -6.93312   | -3.96237 | -0.47567 |
| N                        | -6.70301   | -5.11438 | 0.18342  |
| H                        | -7.08595   | -5.27092 | 1.10312  |
| H                        | -6.10820   | -5.83125 | -0.19894 |
| N                        | -7.85871   | -3.11588 | 0.02942  |
| H                        | -8.57787   | -3.45527 | 0.65083  |
| H                        | -8.04558   | -2.24465 | -0.44789 |
| C                        | -2.28269   | -1.57542 | -2.66591 |
| H                        | -1.72938   | -2.52329 | -2.64321 |
| C                        | -2.03219   | -0.91777 | -4.05253 |
| O                        | -2.97403   | -0.57349 | -4.80532 |
| N                        | -0.75423   | -0.80006 | -4.41001 |
| H                        | -0.05911   | -1.06355 | -3.70552 |
| C                        | -0.34058   | -0.18959 | -5.67004 |
| H                        | 0.74545    | -0.25183 | -5.74112 |
| H                        | -0.78879   | -0.71711 | -6.51613 |
| H                        | -0.64666   | 0.85977  | -5.71639 |



| $\epsilon_L [^\circ] \text{tg}^{-1}$ | 25.3000000 |          |          |
|--------------------------------------|------------|----------|----------|
| C                                    | 0.00000    | 0.00000  | 0.00000  |
| H                                    | 1.08954    | 0.00000  | 0.00000  |
| H                                    | -0.36963   | 1.02982  | 0.00000  |
| H                                    | -0.35321   | -0.48393 | 0.91777  |
| C                                    | -0.47993   | -0.73768 | -1.22412 |
| O                                    | 0.31172    | -1.33893 | -1.97969 |
| N                                    | -1.81582   | -0.78966 | -1.46587 |
| C                                    | -2.93262   | -0.33667 | -0.54138 |
| H                                    | -2.77752   | -0.38229 | 0.53766  |
| H                                    | -3.00854   | 0.71360  | -0.84346 |
| C                                    | -4.29465   | -0.79798 | -1.34184 |
| H                                    | -5.18191   | -0.28996 | -1.72629 |
| H                                    | -4.59692   | -1.31475 | -0.42535 |
| C                                    | -3.72469   | -1.78871 | -2.38741 |
| H                                    | -4.39763   | -1.86851 | -3.24588 |
| C                                    | -3.52215   | -3.22114 | -1.83645 |
| H                                    | -2.91414   | -3.79942 | -2.54133 |
| H                                    | -2.93653   | -3.14659 | -0.91178 |
| C                                    | -4.83169   | -3.99535 | -1.51938 |
| H                                    | -5.58623   | -3.83277 | -2.28678 |
| H                                    | -4.65036   | -5.07400 | -1.48704 |
| N                                    | -5.42027   | -3.61057 | -0.22517 |
| H                                    | -5.01034   | -2.80606 | 0.23160  |
| C                                    | -6.42320   | -4.20875 | 0.43710  |
| N                                    | -7.20081   | -5.14598 | -0.09784 |
| H                                    | -7.81972   | -5.66476 | 0.50963  |
| H                                    | -7.25328   | -5.43129 | -1.09431 |
| N                                    | -6.65225   | -3.82011 | 1.71288  |
| H                                    | -7.49061   | -4.10130 | 2.19831  |
| H                                    | -5.95303   | -3.32780 | 2.24772  |
| C                                    | -2.35397   | -1.21751 | -2.76043 |
| H                                    | -1.71394   | -2.01431 | -3.14953 |
| C                                    | -2.32551   | -0.07754 | -3.81972 |
| O                                    | -1.90579   | 1.03891  | -3.54115 |
| N                                    | -2.80487   | -0.41330 | -5.04484 |
| H                                    | -3.05084   | -1.37442 | -5.23298 |
| C                                    | -2.76638   | 0.52085  | -6.17002 |
| H                                    | -3.46985   | 0.18388  | -6.93319 |
| H                                    | -3.05731   | 1.51304  | -5.82236 |
| H                                    | -1.76268   | 0.58645  | -6.60299 |

Cartesian coordinates and relative energies of all the structures calculated for  
Ac-c-( $\beta$ Pro)Arg-NHMe

| $\alpha_L[d]g^+g^-t$ | 0.0000000 |          |          |
|----------------------|-----------|----------|----------|
| C                    | 0.00000   | 0.00000  | 0.00000  |
| H                    | 1.08900   | 0.00000  | 0.00000  |
| H                    | -0.36300  | 1.03300  | 0.00000  |
| H                    | -0.35600  | -0.47300 | 0.92200  |
| C                    | -0.47500  | -0.76300 | -1.21800 |
| O                    | 0.29200   | -1.33600 | -1.98700 |
| N                    | -1.84000  | -0.77800 | -1.45800 |
| C                    | -2.88200  | -0.33400 | -0.50700 |
| H                    | -2.75600  | -0.82800 | 0.46500  |
| H                    | -2.83700  | 0.74700  | -0.34300 |
| C                    | -4.18400  | -0.77900 | -1.18100 |
| H                    | -4.53500  | -0.02000 | -1.89000 |
| H                    | -4.98400  | -0.95500 | -0.45700 |
| C                    | -3.77600  | -2.06100 | -1.93300 |
| C                    | -2.36200  | -1.68800 | -2.48500 |
| H                    | -1.71000  | -2.56400 | -2.54800 |
| C                    | -2.33200  | -1.08400 | -3.90200 |
| O                    | -2.54100  | -1.81600 | -4.89600 |
| N                    | -2.08200  | 0.22100  | -4.02200 |
| H                    | -1.81500  | 0.70600  | -3.17600 |
| C                    | -1.92800  | 0.89200  | -5.31100 |
| H                    | -2.66000  | 0.49400  | -6.01500 |
| H                    | -2.09800  | 1.96100  | -5.17400 |
| H                    | -0.92400  | 0.73400  | -5.71700 |
| C                    | -4.86700  | -2.58600 | -2.88300 |
| H                    | -5.81700  | -2.54500 | -2.33700 |
| H                    | -4.98800  | -1.92900 | -3.75200 |
| C                    | -4.71300  | -4.04100 | -3.35700 |
| H                    | -4.54200  | -4.69200 | -2.48800 |
| H                    | -5.64600  | -4.35700 | -3.84100 |
| N                    | -3.60000  | -4.16500 | -4.30100 |
| H                    | -3.13600  | -3.26300 | -4.58700 |
| C                    | -3.19000  | -5.28100 | -4.87800 |
| N                    | -3.72900  | -6.47800 | -4.57200 |
| N                    | -2.20600  | -5.22200 | -5.79900 |
| H                    | -4.49200  | -6.55100 | -3.91800 |
| H                    | -1.77000  | -4.33500 | -6.00900 |
| H                    | -3.47200  | -7.31400 | -5.07500 |
| H                    | -1.76600  | -6.05500 | -6.15800 |
| H                    | -3.59300  | -2.83900 | -1.17800 |

| $\alpha_L[d]g^{+}ts^{+}$ | 1.3000000 |          |          |
|--------------------------|-----------|----------|----------|
| C                        | 0.00000   | 0.00000  | 0.00000  |
| H                        | 1.09000   | 0.00000  | 0.00000  |
| H                        | -0.36500  | 1.03200  | 0.00000  |
| H                        | -0.35300  | -0.47400 | 0.92300  |
| C                        | -0.47400  | -0.77100 | -1.21400 |
| O                        | 0.29000   | -1.38700 | -1.95100 |
| N                        | -1.83400  | -0.73900 | -1.48600 |
| C                        | -2.87500  | -0.23200 | -0.56400 |
| H                        | -2.75900  | -0.67800 | 0.43200  |
| H                        | -2.81500  | 0.85500  | -0.45500 |
| C                        | -4.18500  | -0.69100 | -1.21800 |
| H                        | -4.53000  | 0.04700  | -1.95300 |
| H                        | -4.98300  | -0.83000 | -0.48400 |
| C                        | -3.78600  | -2.00000 | -1.92200 |
| C                        | -2.37800  | -1.65300 | -2.49900 |
| H                        | -1.73100  | -2.53300 | -2.56600 |
| C                        | -2.38600  | -1.06500 | -3.92100 |
| O                        | -2.74000  | -1.76500 | -4.89200 |
| N                        | -1.99500  | 0.20600  | -4.06800 |
| H                        | -1.62700  | 0.66200  | -3.24400 |
| C                        | -1.84600  | 0.84600  | -5.37200 |
| H                        | -1.72800  | 1.92000  | -5.22200 |
| H                        | -0.97100  | 0.45700  | -5.90200 |
| H                        | -2.73400  | 0.66200  | -5.97800 |
| C                        | -4.84200  | -2.56300 | -2.88200 |
| H                        | -4.96400  | -1.90500 | -3.74600 |
| H                        | -5.80600  | -2.58900 | -2.36000 |
| C                        | -4.49000  | -3.98400 | -3.35300 |
| H                        | -4.55900  | -4.69200 | -2.52200 |
| H                        | -3.46600  | -4.03000 | -3.72800 |
| N                        | -5.37200  | -4.49100 | -4.41600 |
| H                        | -6.27400  | -4.85700 | -4.14200 |
| C                        | -5.11800  | -4.42600 | -5.73200 |
| N                        | -5.92700  | -5.09700 | -6.58000 |
| N                        | -4.09300  | -3.72400 | -6.20200 |
| H                        | -6.52100  | -5.84600 | -6.25700 |
| H                        | -3.58000  | -3.02400 | -5.63700 |
| H                        | -5.87300  | -4.94700 | -7.57600 |
| H                        | -3.81800  | -3.82800 | -7.16800 |
| H                        | -3.60400  | -2.75000 | -1.13900 |

| $\gamma_L[d]s^{-g^+t}$ | 2.0000000 |          |          |
|------------------------|-----------|----------|----------|
| C                      | 0.00000   | 0.00000  | 0.00000  |
| H                      | 1.08900   | 0.00000  | 0.00000  |
| H                      | -0.36300  | 1.03300  | 0.00000  |
| H                      | -0.35700  | -0.47700 | 0.92000  |
| C                      | -0.47400  | -0.75300 | -1.22200 |
| O                      | 0.31600   | -1.30500 | -1.99900 |
| N                      | -1.82400  | -0.80000 | -1.44900 |
| C                      | -2.86900  | -0.27700 | -0.54300 |
| H                      | -2.74700  | -0.70100 | 0.46000  |
| H                      | -2.81200  | 0.81300  | -0.46100 |
| C                      | -4.18400  | -0.74900 | -1.18400 |
| H                      | -4.55700  | 0.00600  | -1.88300 |
| H                      | -4.95400  | -0.92300 | -0.42700 |
| C                      | -3.76500  | -2.04000 | -1.92000 |
| C                      | -2.37500  | -1.67500 | -2.50300 |
| H                      | -1.74000  | -2.56300 | -2.57800 |
| C                      | -2.30800  | -0.95400 | -3.87300 |
| O                      | -3.29800  | -0.43600 | -4.44300 |
| N                      | -1.08800  | -0.90800 | -4.40800 |
| H                      | -0.31900  | -1.22600 | -3.81200 |
| C                      | -0.79600  | -0.21500 | -5.65900 |
| H                      | -0.92400  | 0.86700  | -5.55200 |
| H                      | 0.23600   | -0.42900 | -5.93700 |
| H                      | -1.46300  | -0.56900 | -6.44900 |
| H                      | -3.51500  | -2.76100 | -1.13100 |
| C                      | -4.79600  | -2.76300 | -2.83600 |
| H                      | -4.32300  | -3.07200 | -3.77500 |
| H                      | -5.09700  | -3.69100 | -2.34000 |
| C                      | -6.10600  | -2.03200 | -3.17200 |
| H                      | -6.78300  | -2.74400 | -3.66100 |
| H                      | -6.59300  | -1.68000 | -2.25300 |
| N                      | -5.84700  | -0.90700 | -4.07200 |
| H                      | -4.83200  | -0.67200 | -4.20600 |
| C                      | -6.74100  | -0.25100 | -4.78600 |
| N                      | -6.32000  | 0.62300  | -5.72700 |
| N                      | -8.06600  | -0.43300 | -4.61700 |
| H                      | -8.73200  | -0.07200 | -5.28400 |
| H                      | -5.32700  | 0.75200  | -5.86600 |
| H                      | -6.93600  | 1.33500  | -6.08800 |
| H                      | -8.41800  | -1.04000 | -3.89500 |

| $\gamma_L[d]s^{-ts}$ | 3.1000000 |          |          |
|----------------------|-----------|----------|----------|
| C                    | 0.00000   | 0.00000  | 0.00000  |
| H                    | 1.08900   | 0.00000  | 0.00000  |
| H                    | -0.36100  | 1.03400  | 0.00000  |
| H                    | -0.35900  | -0.47600 | 0.91900  |
| C                    | -0.47300  | -0.74800 | -1.22600 |
| O                    | 0.32300   | -1.26700 | -2.02200 |
| N                    | -1.82300  | -0.82400 | -1.43700 |
| C                    | -2.86000  | -0.32500 | -0.50900 |
| H                    | -2.73700  | -0.78300 | 0.48000  |
| H                    | -2.79500  | 0.76100  | -0.39200 |
| C                    | -4.17500  | -0.76900 | -1.16200 |
| H                    | -4.51800  | -0.00300 | -1.86400 |
| H                    | -4.96000  | -0.92800 | -0.41700 |
| C                    | -3.77300  | -2.06100 | -1.90400 |
| C                    | -2.37900  | -1.70700 | -2.48400 |
| H                    | -1.74400  | -2.59900 | -2.55000 |
| C                    | -2.34800  | -1.03600 | -3.88000 |
| O                    | -3.38700  | -0.73200 | -4.50700 |
| N                    | -1.12500  | -0.81900 | -4.36900 |
| H                    | -0.33900  | -1.05500 | -3.75700 |
| C                    | -0.89100  | -0.16800 | -5.65300 |
| H                    | -1.43800  | 0.77700  | -5.71200 |
| H                    | 0.17700   | 0.02500  | -5.75100 |
| H                    | -1.21200  | -0.80900 | -6.48100 |
| C                    | -4.80900  | -2.71800 | -2.85400 |
| H                    | -4.29100  | -3.13600 | -3.72300 |
| H                    | -5.26500  | -3.57000 | -2.33600 |
| C                    | -5.94200  | -1.79900 | -3.34400 |
| H                    | -6.65500  | -1.59200 | -2.54100 |
| H                    | -5.55200  | -0.84400 | -3.69200 |
| N                    | -6.71600  | -2.39800 | -4.44500 |
| H                    | -7.40900  | -3.09400 | -4.20600 |
| C                    | -6.47900  | -2.20600 | -5.75000 |
| N                    | -5.41500  | -1.52700 | -6.17100 |
| N                    | -7.35000  | -2.71700 | -6.64900 |
| H                    | -4.63700  | -1.25300 | -5.54800 |
| H                    | -8.27500  | -3.01100 | -6.37500 |
| H                    | -5.36000  | -1.23900 | -7.13700 |
| H                    | -7.13300  | -2.72900 | -7.63400 |
| H                    | -3.55200  | -2.80500 | -1.12800 |

| $\gamma_L[u]s^+g^-t$ | 3.9000000 |          |          |
|----------------------|-----------|----------|----------|
| C                    | 0.00000   | 0.00000  | 0.00000  |
| H                    | 1.09000   | 0.00000  | 0.00000  |
| H                    | -0.36700  | 1.03000  | 0.00000  |
| H                    | -0.34100  | -0.48300 | 0.92300  |
| C                    | -0.45900  | -0.78300 | -1.21300 |
| O                    | 0.33300   | -1.50900 | -1.82900 |
| N                    | -1.76200  | -0.65000 | -1.61700 |
| C                    | -2.80800  | -0.05400 | -0.75100 |
| H                    | -2.48900  | -0.03500 | 0.29100  |
| H                    | -3.01900  | 0.97700  | -1.05900 |
| C                    | -4.01000  | -0.97300 | -0.97700 |
| H                    | -4.95900  | -0.50500 | -0.70100 |
| H                    | -3.89800  | -1.88600 | -0.38300 |
| C                    | -3.90800  | -1.28700 | -2.48100 |
| C                    | -2.38000  | -1.55100 | -2.63500 |
| H                    | -2.17700  | -2.58800 | -2.32400 |
| C                    | -1.88300  | -1.50600 | -4.10000 |
| O                    | -2.67300  | -1.82200 | -5.02500 |
| N                    | -0.61000  | -1.21400 | -4.34300 |
| H                    | 0.01600   | -1.22000 | -3.53100 |
| C                    | -0.04800  | -1.26800 | -5.69000 |
| H                    | 0.96300   | -0.86000 | -5.65600 |
| H                    | -0.01000  | -2.29800 | -6.06200 |
| H                    | -0.65500  | -0.67400 | -6.37600 |
| C                    | -4.49200  | -0.11400 | -3.32900 |
| H                    | -4.82200  | 0.69400  | -2.66800 |
| H                    | -3.74200  | 0.32600  | -3.99200 |
| C                    | -5.71000  | -0.51900 | -4.17300 |
| H                    | -6.48600  | -0.95900 | -3.53100 |
| H                    | -6.12900  | 0.37200  | -4.65800 |
| N                    | -5.28600  | -1.49100 | -5.18300 |
| H                    | -4.25800  | -1.70300 | -5.17100 |
| C                    | -6.05900  | -2.08900 | -6.06900 |
| N                    | -7.37200  | -1.80500 | -6.17100 |
| N                    | -5.52900  | -3.02500 | -6.88600 |
| H                    | -7.79900  | -1.10600 | -5.58300 |
| H                    | -4.53500  | -3.20500 | -6.85000 |
| H                    | -7.98200  | -2.34300 | -6.76700 |
| H                    | -6.02300  | -3.34000 | -7.70700 |
| H                    | -4.44400  | -2.20900 | -2.72400 |

| $\gamma_L[d]g^-s^+$ | 5.1000000 |          |          |
|---------------------|-----------|----------|----------|
| C                   | 0.00000   | 0.00000  | 0.00000  |
| H                   | 1.08935   | 0.00000  | 0.00000  |
| H                   | -0.36094  | 1.03403  | 0.00000  |
| H                   | -0.36098  | -0.47483 | 0.91866  |
| C                   | -0.47701  | -0.74138 | -1.22699 |
| O                   | 0.31524   | -1.23624 | -2.04575 |
| N                   | -1.82588  | -0.83697 | -1.42274 |
| C                   | -2.90144  | -0.36876 | -0.49293 |
| H                   | -2.77526  | -0.83396 | 0.49205  |
| H                   | -2.86932  | 0.71675  | -0.36565 |
| C                   | -4.19650  | -0.79910 | -1.20941 |
| H                   | -4.57257  | -0.02217 | -1.88224 |
| H                   | -4.98370  | -1.03895 | -0.48981 |
| C                   | -3.74570  | -2.04490 | -2.02602 |
| C                   | -2.35346  | -1.61861 | -2.54423 |
| H                   | -1.67068  | -2.46379 | -2.68229 |
| C                   | -2.36888  | -0.79132 | -3.85388 |
| O                   | -3.38506  | -0.28748 | -4.32668 |
| N                   | -1.14861  | -0.73711 | -4.48904 |
| H                   | -0.35532  | -0.76609 | -3.83639 |
| C                   | -0.99454  | 0.10226  | -5.68701 |
| H                   | -1.75946  | -0.15430 | -6.42137 |
| H                   | -1.09686  | 1.16550  | -5.44673 |
| H                   | -0.00520  | -0.07461 | -6.11231 |
| C                   | -4.83273  | -2.50450 | -3.01046 |
| H                   | -4.34571  | -3.15188 | -3.75040 |
| H                   | -5.56685  | -3.12687 | -2.49219 |
| C                   | -5.55794  | -1.42312 | -3.82280 |
| H                   | -4.83827  | -0.75055 | -4.29903 |
| H                   | -6.15198  | -1.89457 | -4.61196 |
| N                   | -6.46033  | -0.60342 | -2.98290 |
| H                   | -6.97218  | -1.11577 | -2.27058 |
| C                   | -6.42305  | 0.72510  | -2.83660 |
| N                   | -5.98521  | 1.50462  | -3.84193 |
| N                   | -6.84446  | 1.28054  | -1.69180 |
| H                   | -5.97573  | 1.16866  | -4.79369 |
| H                   | -6.73402  | 0.76469  | -0.81181 |
| H                   | -5.79055  | 2.48360  | -3.69185 |
| H                   | -7.03445  | 2.27137  | -1.64266 |
| H                   | -3.54049  | -2.87518 | -1.33414 |

| $\gamma_L[u]s^{+}ts^{+}$ | 5.4000000 |          |          |
|--------------------------|-----------|----------|----------|
| C                        | 0.00000   | 0.00000  | 0.00000  |
| H                        | 1.08979   | 0.00000  | 0.00000  |
| H                        | -0.36704  | 1.02982  | 0.00000  |
| H                        | -0.34010  | -0.48379 | 0.92300  |
| C                        | -0.45919  | -0.78198 | -1.21350 |
| O                        | 0.33368   | -1.51225 | -1.82438 |
| N                        | -1.75929  | -0.64351 | -1.62487 |
| C                        | -2.82378  | -0.10122 | -0.75021 |
| H                        | -2.47622  | -0.00744 | 0.27749  |
| H                        | -3.13552  | 0.89311  | -1.09464 |
| C                        | -3.94247  | -1.13160 | -0.90779 |
| H                        | -4.91803  | -0.75785 | -0.58548 |
| H                        | -3.70842  | -2.02240 | -0.31440 |
| C                        | -3.88850  | -1.45015 | -2.41455 |
| C                        | -2.34961  | -1.55426 | -2.65463 |
| H                        | -2.02621  | -2.57574 | -2.40619 |
| C                        | -1.89614  | -1.34752 | -4.12332 |
| O                        | -2.73217  | -1.37884 | -5.05362 |
| N                        | -0.58892  | -1.23651 | -4.34932 |
| H                        | 0.02821   | -1.36137 | -3.53883 |
| C                        | -0.03578  | -1.15309 | -5.69600 |
| H                        | -0.39026  | -0.25262 | -6.20625 |
| H                        | 1.05079   | -1.11040 | -5.61770 |
| H                        | -0.32190  | -2.02572 | -6.29114 |
| C                        | -4.64816  | -0.36921 | -3.23945 |
| H                        | -5.23625  | 0.26083  | -2.56090 |
| H                        | -3.95659  | 0.29649  | -3.75956 |
| C                        | -5.60491  | -1.00720 | -4.26032 |
| H                        | -5.09065  | -1.78016 | -4.83180 |
| H                        | -6.44984  | -1.48131 | -3.75196 |
| N                        | -6.17809  | -0.04242 | -5.21422 |
| H                        | -6.97732  | 0.49809  | -4.91172 |
| C                        | -5.66314  | 0.26251  | -6.41312 |
| N                        | -4.46857  | -0.18489 | -6.78980 |
| N                        | -6.38479  | 1.04217  | -7.24890 |
| H                        | -3.79780  | -0.62342 | -6.13490 |
| H                        | -7.37692  | 1.17057  | -7.12003 |
| H                        | -4.18850  | -0.10281 | -7.75605 |
| H                        | -5.97472  | 1.42241  | -8.08819 |
| H                        | -4.33570  | -2.42869 | -2.61781 |



| $\epsilon_L[u]g^-g^+t$ | 5.4000000 |          |          |
|------------------------|-----------|----------|----------|
| C                      | 0.00000   | 0.00000  | 0.00000  |
| H                      | 1.09002   | 0.00000  | 0.00000  |
| H                      | -0.37109  | 1.02933  | 0.00000  |
| H                      | -0.34187  | -0.47878 | 0.92520  |
| C                      | -0.47389  | -0.78856 | -1.20276 |
| O                      | 0.26629   | -1.54436 | -1.83147 |
| N                      | -1.78495  | -0.63277 | -1.59016 |
| C                      | -2.85588  | -0.01277 | -0.78967 |
| H                      | -2.69561  | -0.17606 | 0.27905  |
| H                      | -2.88497  | 1.07099  | -0.95928 |
| C                      | -4.13095  | -0.71417 | -1.28959 |
| H                      | -5.02037  | -0.08338 | -1.20159 |
| H                      | -4.31354  | -1.61110 | -0.68961 |
| C                      | -3.82130  | -1.12410 | -2.74924 |
| C                      | -2.31119  | -1.51125 | -2.64096 |
| H                      | -2.26332  | -2.55112 | -2.28673 |
| C                      | -1.48222  | -1.43371 | -3.93086 |
| O                      | -1.18539  | -0.34315 | -4.46305 |
| N                      | -1.16534  | -2.60302 | -4.50065 |
| H                      | -1.26889  | -3.43790 | -3.94034 |
| C                      | -0.32934  | -2.69222 | -5.69641 |
| H                      | 0.72135   | -2.50570 | -5.45133 |
| H                      | -0.43271  | -3.69128 | -6.12154 |
| H                      | -0.65880  | -1.95189 | -6.42613 |
| C                      | -4.28693  | -0.09180 | -3.81330 |
| H                      | -3.91234  | -0.37806 | -4.80219 |
| H                      | -5.37662  | -0.19466 | -3.86677 |
| C                      | -4.03231  | 1.41271  | -3.60633 |
| H                      | -4.62686  | 1.95638  | -4.35225 |
| H                      | -4.37948  | 1.72725  | -2.61346 |
| N                      | -2.61676  | 1.74360  | -3.77670 |
| H                      | -1.97799  | 0.93111  | -3.98872 |
| C                      | -2.10713  | 2.95835  | -3.86107 |
| N                      | -2.84141  | 4.06161  | -3.60679 |
| N                      | -0.81102  | 3.10443  | -4.20716 |
| H                      | -3.81943  | 3.98628  | -3.37595 |
| H                      | -0.25346  | 2.28437  | -4.40525 |
| H                      | -2.49588  | 4.98044  | -3.83902 |
| H                      | -0.32858  | 3.98174  | -4.08881 |
| H                      | -4.36697  | -2.03908 | -2.99971 |

| $\epsilon_L[\text{u}]\text{g}^{-\text{ct}}$ | 5.5000000 |          |          |
|---------------------------------------------|-----------|----------|----------|
| C                                           | 0.00000   | 0.00000  | 0.00000  |
| H                                           | 1.11892   | 0.00000  | 0.00000  |
| H                                           | -0.36415  | 1.05418  | 0.00000  |
| H                                           | -0.35731  | -0.51308 | 0.92715  |
| C                                           | -0.47944  | -0.76372 | -1.20457 |
| O                                           | 0.26115   | -1.54546 | -1.82452 |
| N                                           | -1.79463  | -0.57213 | -1.65523 |
| C                                           | -2.84805  | -0.02452 | -0.80081 |
| H                                           | -2.52596  | -0.02356 | 0.27874  |
| H                                           | -3.07692  | 1.03675  | -1.06182 |
| C                                           | -4.07171  | -0.96061 | -0.98571 |
| H                                           | -5.02585  | -0.44534 | -0.73770 |
| H                                           | -3.97698  | -1.88916 | -0.37620 |
| C                                           | -3.91731  | -1.27152 | -2.48287 |
| C                                           | -2.39055  | -1.57696 | -2.56223 |
| H                                           | -2.15353  | -2.61841 | -2.21297 |
| C                                           | -1.90767  | -1.36240 | -4.01500 |
| O                                           | -1.48402  | -0.24967 | -4.39531 |
| N                                           | -2.21831  | -2.36151 | -4.92200 |
| H                                           | -2.18169  | -3.29808 | -4.58268 |
| C                                           | -1.90432  | -2.20901 | -6.31562 |
| H                                           | -0.86202  | -2.55941 | -6.54728 |
| H                                           | -2.63459  | -2.81879 | -6.91129 |
| H                                           | -1.99065  | -1.12960 | -6.61054 |
| C                                           | -4.66793  | -0.66767 | -3.63908 |
| H                                           | -4.47270  | -1.30853 | -4.54373 |
| H                                           | -5.75992  | -0.79746 | -3.37921 |
| C                                           | -4.53366  | 0.78071  | -4.12410 |
| H                                           | -4.08581  | 0.76644  | -5.16416 |
| H                                           | -5.58092  | 1.19275  | -4.20322 |
| N                                           | -3.72962  | 1.64058  | -3.28822 |
| H                                           | -2.83087  | 1.21733  | -3.07853 |
| C                                           | -3.73598  | 3.02384  | -3.40364 |
| N                                           | -4.79304  | 3.70168  | -3.96598 |
| N                                           | -2.68948  | 3.74213  | -2.86534 |
| H                                           | -5.57518  | 3.21048  | -4.33419 |
| H                                           | -1.87284  | 3.27640  | -2.53647 |
| H                                           | -4.84387  | 4.69414  | -3.92225 |
| H                                           | -2.70982  | 4.73535  | -2.83260 |
| H                                           | -4.36084  | -2.33242 | -2.54680 |

| $\alpha_L[u]g^+g^+s^-$ | 5.7000000 |          |          |
|------------------------|-----------|----------|----------|
| C                      | 0.00000   | 0.00000  | 0.00000  |
| H                      | 1.08994   | 0.00000  | 0.00000  |
| H                      | -0.36784  | 1.03017  | 0.00000  |
| H                      | -0.34120  | -0.47988 | 0.92473  |
| C                      | -0.46479  | -0.78736 | -1.20842 |
| O                      | 0.29055   | -1.51148 | -1.84971 |
| N                      | -1.78789  | -0.64506 | -1.60857 |
| C                      | -2.87909  | -0.12731 | -0.76041 |
| H                      | -2.54560  | 0.01221  | 0.26775  |
| H                      | -3.23243  | 0.84222  | -1.13398 |
| C                      | -3.95411  | -1.21047 | -0.89311 |
| H                      | -4.95330  | -0.85247 | -0.62932 |
| H                      | -3.71039  | -2.04535 | -0.22723 |
| C                      | -3.84888  | -1.66610 | -2.36902 |
| C                      | -2.29992  | -1.59847 | -2.61102 |
| H                      | -1.85564  | -2.58039 | -2.40866 |
| C                      | -1.88450  | -1.30079 | -4.05330 |
| O                      | -2.15420  | -2.13010 | -4.94915 |
| N                      | -1.26328  | -0.14591 | -4.30723 |
| H                      | -1.00060  | 0.40754  | -3.50214 |
| C                      | -0.69159  | 0.19576  | -5.60760 |
| H                      | -1.26735  | -0.29733 | -6.39036 |
| H                      | -0.73469  | 1.27775  | -5.74597 |
| H                      | 0.34956   | -0.13665 | -5.67186 |
| C                      | -4.75129  | -0.81078 | -3.29184 |
| H                      | -5.67881  | -0.60132 | -2.74418 |
| H                      | -4.29962  | 0.16809  | -3.49447 |
| C                      | -5.14529  | -1.41431 | -4.65453 |
| H                      | -5.85487  | -0.74233 | -5.14758 |
| H                      | -4.28897  | -1.51963 | -5.31744 |
| N                      | -5.80406  | -2.72919 | -4.54882 |
| H                      | -6.74476  | -2.74025 | -4.17699 |
| C                      | -5.29573  | -3.91673 | -4.91528 |
| N                      | -4.00787  | -4.07151 | -5.19896 |
| N                      | -6.13142  | -4.97928 | -4.96974 |
| H                      | -3.28498  | -3.33464 | -5.02760 |
| H                      | -7.13063  | -4.85825 | -5.03547 |
| H                      | -3.69854  | -4.92629 | -5.63919 |
| H                      | -5.77182  | -5.91350 | -5.09356 |
| H                      | -4.16945  | -2.70922 | -2.45111 |

| $\gamma_L[u]s^+g^+s^-$ | 6.0000000 |          |          |
|------------------------|-----------|----------|----------|
| C                      | 0.00000   | 0.00000  | 0.00000  |
| H                      | 1.08973   | 0.00000  | 0.00000  |
| H                      | -0.36756  | 1.02987  | 0.00000  |
| H                      | -0.34161  | -0.48186 | 0.92356  |
| C                      | -0.46008  | -0.78421 | -1.21202 |
| O                      | 0.32968   | -1.50236 | -1.83758 |
| N                      | -1.76674  | -0.65519 | -1.60842 |
| C                      | -2.80274  | -0.03372 | -0.74985 |
| H                      | -2.50648  | -0.05544 | 0.29877  |
| H                      | -2.96255  | 1.01354  | -1.03499 |
| C                      | -4.03933  | -0.89073 | -1.02381 |
| H                      | -4.97167  | -0.37913 | -0.77109 |
| H                      | -3.98960  | -1.81247 | -0.43370 |
| C                      | -3.90901  | -1.21077 | -2.52533 |
| C                      | -2.38944  | -1.55774 | -2.61945 |
| H                      | -2.24697  | -2.59470 | -2.27873 |
| C                      | -1.87072  | -1.56854 | -4.06965 |
| O                      | -2.61301  | -2.05452 | -4.95509 |
| N                      | -0.65275  | -1.10982 | -4.35082 |
| H                      | -0.01710  | -1.02996 | -3.55476 |
| C                      | -0.08677  | -1.20789 | -5.69496 |
| H                      | -0.77833  | -0.78365 | -6.42488 |
| H                      | 0.84818   | -0.64715 | -5.71421 |
| H                      | 0.10943   | -2.25015 | -5.96753 |
| C                      | -4.38071  | 0.00160  | -3.37853 |
| H                      | -5.11096  | 0.56603  | -2.78511 |
| H                      | -3.55208  | 0.69681  | -3.56028 |
| C                      | -5.02289  | -0.28100 | -4.74843 |
| H                      | -5.40293  | 0.65876  | -5.16134 |
| H                      | -4.29823  | -0.67805 | -5.45600 |
| N                      | -6.16554  | -1.21245 | -4.69475 |
| H                      | -7.03550  | -0.85646 | -4.32120 |
| C                      | -6.17471  | -2.48187 | -5.12860 |
| N                      | -5.04699  | -3.12426 | -5.41186 |
| N                      | -7.36457  | -3.11215 | -5.25389 |
| H                      | -4.10796  | -2.73789 | -5.17236 |
| H                      | -8.22757  | -2.59428 | -5.32113 |
| H                      | -5.08440  | -3.99995 | -5.91313 |
| H                      | -7.40865  | -4.10578 | -5.42175 |
| H                      | -4.49973  | -2.09479 | -2.77844 |

| $\gamma_L[u]g^{-}tg^{-}$ | 6.5000000 |          |          |
|--------------------------|-----------|----------|----------|
| C                        | 0.00000   | 0.00000  | 0.00000  |
| H                        | 1.08988   | 0.00000  | 0.00000  |
| H                        | -0.36707  | 1.02999  | 0.00000  |
| H                        | -0.33995  | -0.48390 | 0.92307  |
| C                        | -0.46325  | -0.78071 | -1.21204 |
| O                        | 0.31185   | -1.51894 | -1.83005 |
| N                        | -1.76998  | -0.63554 | -1.61740 |
| C                        | -2.86110  | -0.13600 | -0.76392 |
| H                        | -2.52388  | -0.00647 | 0.26432  |
| H                        | -3.21479  | 0.83914  | -1.12204 |
| C                        | -3.92901  | -1.22753 | -0.90001 |
| H                        | -4.93284  | -0.87844 | -0.63904 |
| H                        | -3.68650  | -2.05186 | -0.22179 |
| C                        | -3.82054  | -1.70293 | -2.37208 |
| C                        | -2.29197  | -1.53061 | -2.68159 |
| H                        | -1.80878  | -2.50326 | -2.53838 |
| C                        | -1.85967  | -1.04381 | -4.08928 |
| O                        | -2.57624  | -0.34454 | -4.83314 |
| N                        | -0.63757  | -1.44360 | -4.45645 |
| H                        | -0.04845  | -1.81804 | -3.71193 |
| C                        | -0.02764  | -1.04234 | -5.71900 |
| H                        | 0.19345   | 0.03047  | -5.73343 |
| H                        | 0.90002   | -1.60107 | -5.84603 |
| H                        | -0.70078  | -1.27023 | -6.54825 |
| C                        | -4.88742  | -1.07497 | -3.30143 |
| H                        | -4.70784  | -1.40014 | -4.32851 |
| H                        | -5.85049  | -1.50635 | -2.99760 |
| C                        | -5.02842  | 0.45606  | -3.27637 |
| H                        | -5.37900  | 0.80848  | -2.30309 |
| H                        | -4.07820  | 0.94819  | -3.48465 |
| N                        | -6.01318  | 0.94090  | -4.26137 |
| H                        | -6.98979  | 0.88898  | -4.00431 |
| C                        | -5.74258  | 1.28356  | -5.52858 |
| N                        | -4.53102  | 1.11055  | -6.04744 |
| N                        | -6.72924  | 1.82052  | -6.27973 |
| H                        | -3.79984  | 0.54994  | -5.58066 |
| H                        | -7.56354  | 2.19855  | -5.85743 |
| H                        | -4.30258  | 1.52793  | -6.93755 |
| H                        | -6.61119  | 1.95685  | -7.27202 |
| H                        | -4.02365  | -2.77714 | -2.41672 |

| $\gamma_L [^\circ] g^-s^-$ | 7.3000000 |          |          |
|----------------------------|-----------|----------|----------|
| C                          | 0.00000   | 0.00000  | 0.00000  |
| H                          | 1.08937   | 0.00000  | 0.00000  |
| H                          | -0.36177  | 1.03373  | 0.00000  |
| H                          | -0.35752  | -0.47616 | 0.91965  |
| C                          | -0.47453  | -0.74923 | -1.22526 |
| O                          | 0.31388   | -1.27630 | -2.01999 |
| N                          | -1.82707  | -0.81580 | -1.43469 |
| C                          | -2.87745  | -0.31701 | -0.52488 |
| H                          | -2.73431  | -0.72708 | 0.48174  |
| H                          | -2.85568  | 0.77473  | -0.45251 |
| C                          | -4.17684  | -0.84518 | -1.15342 |
| H                          | -4.58139  | -0.10939 | -1.85551 |
| H                          | -4.93578  | -1.06094 | -0.39549 |
| C                          | -3.71767  | -2.11072 | -1.91197 |
| C                          | -2.36928  | -1.65166 | -2.52684 |
| H                          | -1.69789  | -2.50638 | -2.65811 |
| C                          | -2.34089  | -0.83345 | -3.82826 |
| O                          | -3.31831  | -0.19968 | -4.25890 |
| N                          | -1.14395  | -0.84310 | -4.44178 |
| H                          | -0.36500  | -1.21721 | -3.89873 |
| C                          | -0.85846  | -0.02617 | -5.61502 |
| H                          | -1.06486  | 1.03208  | -5.42394 |
| H                          | 0.19485   | -0.14510 | -5.87015 |
| H                          | -1.46129  | -0.35114 | -6.46825 |
| C                          | -4.82822  | -2.89126 | -2.65728 |
| H                          | -4.45542  | -3.91315 | -2.81343 |
| H                          | -5.61754  | -3.01535 | -1.90208 |
| C                          | -5.54050  | -2.60152 | -3.99900 |
| H                          | -4.83875  | -2.74250 | -4.82491 |
| H                          | -6.32675  | -3.35291 | -4.11268 |
| N                          | -6.15665  | -1.27373 | -4.18724 |
| H                          | -6.78634  | -0.98565 | -3.44670 |
| C                          | -5.74591  | -0.27686 | -4.97813 |
| N                          | -5.26403  | -0.51693 | -6.21012 |
| N                          | -6.00307  | 0.99325  | -4.62580 |
| H                          | -5.23896  | -1.46898 | -6.54488 |
| H                          | -5.95942  | 1.26349  | -3.65417 |
| H                          | -4.52156  | 0.08295  | -6.54439 |
| H                          | -5.88795  | 1.72955  | -5.30756 |
| H                          | -3.40764  | -2.82751 | -1.14030 |

| $\gamma_L[u]tg^-$ | 8.9000000 |          |          |
|-------------------|-----------|----------|----------|
| C                 | 0.00000   | 0.00000  | 0.00000  |
| H                 | 1.08978   | 0.00000  | 0.00000  |
| H                 | -0.36714  | 1.02988  | 0.00000  |
| H                 | -0.34027  | -0.48289 | 0.92352  |
| C                 | -0.45951  | -0.78397 | -1.21231 |
| O                 | 0.32942   | -1.51490 | -1.82537 |
| N                 | -1.76053  | -0.64465 | -1.62104 |
| C                 | -2.80714  | -0.04853 | -0.76101 |
| H                 | -2.49436  | -0.03364 | 0.28262  |
| H                 | -3.01064  | 0.98597  | -1.06452 |
| C                 | -4.01615  | -0.96016 | -0.99073 |
| H                 | -4.95969  | -0.46912 | -0.73368 |
| H                 | -3.92758  | -1.85904 | -0.37109 |
| C                 | -3.90261  | -1.31511 | -2.48585 |
| C                 | -2.36817  | -1.54591 | -2.64306 |
| H                 | -2.14871  | -2.58069 | -2.33720 |
| C                 | -1.87679  | -1.47085 | -4.10925 |
| O                 | -2.67409  | -1.73102 | -5.04060 |
| N                 | -0.60403  | -1.16524 | -4.34654 |
| H                 | 0.03080   | -1.19290 | -3.54409 |
| C                 | -0.08804  | -0.96535 | -5.69695 |
| H                 | -0.76121  | -0.31666 | -6.26147 |
| H                 | 0.89285   | -0.49477 | -5.62192 |
| H                 | 0.00920   | -1.91431 | -6.23448 |
| C                 | -4.51690  | -0.19864 | -3.36285 |
| H                 | -4.38287  | 0.77997  | -2.88575 |
| H                 | -4.01677  | -0.12498 | -4.32591 |
| C                 | -6.02968  | -0.34160 | -3.58919 |
| H                 | -6.57015  | -0.18886 | -2.65171 |
| H                 | -6.36601  | 0.43312  | -4.28707 |
| N                 | -6.51562  | -1.65963 | -4.07516 |
| H                 | -7.28671  | -2.05469 | -3.55446 |
| C                 | -6.30030  | -2.21978 | -5.28060 |
| N                 | -5.17659  | -2.00532 | -5.95552 |
| N                 | -7.25696  | -3.02269 | -5.79321 |
| H                 | -4.26238  | -1.82401 | -5.48399 |
| H                 | -8.21415  | -2.97187 | -5.47764 |
| H                 | -5.12047  | -2.32497 | -6.91292 |
| H                 | -7.04678  | -3.67125 | -6.53771 |
| H                 | -4.41079  | -2.25740 | -2.70877 |

| $\gamma_L [^\circ]_{ttt}$ | 13.7000000 |          |          |
|---------------------------|------------|----------|----------|
| C                         | 0.00000    | 0.00000  | 0.00000  |
| H                         | 1.08944    | 0.00000  | 0.00000  |
| H                         | -0.35932   | 1.03489  | 0.00000  |
| H                         | -0.36021   | -0.47564 | 0.91867  |
| C                         | -0.47407   | -0.74126 | -1.23176 |
| O                         | 0.31661    | -1.21903 | -2.05489 |
| N                         | -1.82520   | -0.85863 | -1.40886 |
| C                         | -2.87105   | -0.39088 | -0.47944 |
| H                         | -2.72526   | -0.83665 | 0.51228  |
| H                         | -2.84806   | 0.69746  | -0.36780 |
| C                         | -4.18004   | -0.87982 | -1.12429 |
| H                         | -4.58326   | -0.11655 | -1.79659 |
| H                         | -4.93155   | -1.10941 | -0.36247 |
| C                         | -3.74038   | -2.10896 | -1.94796 |
| C                         | -2.37066   | -1.66664 | -2.51446 |
| H                         | -1.70509   | -2.51988 | -2.68015 |
| C                         | -2.43259   | -0.82664 | -3.81973 |
| O                         | -3.48300   | -0.32321 | -4.23686 |
| N                         | -1.24250   | -0.69805 | -4.44102 |
| H                         | -0.42001   | -1.00663 | -3.92496 |
| C                         | -1.07642   | 0.14572  | -5.61878 |
| H                         | -1.10261   | 1.21041  | -5.36001 |
| H                         | -0.11647   | -0.08674 | -6.08237 |
| H                         | -1.88039   | -0.05202 | -6.33033 |
| C                         | -4.74309   | -2.62402 | -2.99003 |
| H                         | -5.01069   | -1.79983 | -3.65672 |
| H                         | -4.26018   | -3.40164 | -3.59819 |
| C                         | -6.00390   | -3.21748 | -2.35703 |
| H                         | -5.75147   | -4.08451 | -1.73207 |
| H                         | -6.51604   | -2.47125 | -1.73952 |
| N                         | -6.92554   | -3.64262 | -3.43200 |
| H                         | -6.57168   | -3.58335 | -4.37892 |
| C                         | -8.17379   | -4.07218 | -3.26427 |
| N                         | -8.64792   | -4.31701 | -2.03349 |
| N                         | -8.97822   | -4.25827 | -4.32599 |
| H                         | -8.03951   | -4.31142 | -1.22915 |
| H                         | -8.71161   | -3.94425 | -5.24750 |
| H                         | -9.62775   | -4.49872 | -1.87463 |
| H                         | -9.85081   | -4.75869 | -4.24428 |
| H                         | -3.51795   | -2.92820 | -1.24774 |



| $\gamma_L [^\circ] g^+ g^+ t$ | 13.8000000 |          |          |
|-------------------------------|------------|----------|----------|
| C                             | 0.00000    | 0.00000  | 0.00000  |
| H                             | 1.08941    | 0.00000  | 0.00000  |
| H                             | -0.35984   | 1.03444  | 0.00000  |
| H                             | -0.36063   | -0.47389 | 0.91942  |
| C                             | -0.47485   | -0.74255 | -1.22975 |
| O                             | 0.31897    | -1.23675 | -2.04440 |
| N                             | -1.82337   | -0.84086 | -1.42145 |
| C                             | -2.86701   | -0.36896 | -0.48588 |
| H                             | -2.70861   | -0.80420 | 0.50819  |
| H                             | -2.84532   | 0.72026  | -0.38686 |
| C                             | -4.17327   | -0.87445 | -1.11522 |
| H                             | -4.58769   | -0.12527 | -1.79700 |
| H                             | -4.92945   | -1.10396 | -0.35934 |
| C                             | -3.73508   | -2.11351 | -1.92321 |
| C                             | -2.37280   | -1.66910 | -2.51433 |
| H                             | -1.69158   | -2.51571 | -2.66020 |
| C                             | -2.43870   | -0.88326 | -3.85228 |
| O                             | -3.51034   | -0.59028 | -4.39393 |
| N                             | -1.23249   | -0.58540 | -4.37894 |
| H                             | -0.41000   | -0.80657 | -3.81825 |
| C                             | -1.09950   | 0.22971  | -5.58188 |
| H                             | -1.38747   | 1.26979  | -5.39476 |
| H                             | -0.05910   | 0.19977  | -5.90868 |
| H                             | -1.74130   | -0.16038 | -6.37528 |
| C                             | -4.83634   | -2.64168 | -2.85873 |
| H                             | -5.63558   | -3.07965 | -2.24434 |
| H                             | -5.27332   | -1.80887 | -3.41167 |
| C                             | -4.40161   | -3.65475 | -3.91903 |
| H                             | -5.26325   | -3.92466 | -4.54148 |
| H                             | -3.63915   | -3.20459 | -4.55941 |
| N                             | -3.83856   | -4.88378 | -3.31473 |
| H                             | -4.18616   | -5.14466 | -2.40034 |
| C                             | -3.02916   | -5.74791 | -3.92487 |
| N                             | -2.74750   | -5.61991 | -5.22925 |
| N                             | -2.47383   | -6.76066 | -3.23357 |
| H                             | -3.25224   | -4.96933 | -5.81237 |
| H                             | -2.50103   | -6.78473 | -2.22515 |
| H                             | -1.98845   | -6.13258 | -5.65332 |
| H                             | -2.02606   | -7.53385 | -3.70281 |
| H                             | -3.48328   | -2.90336 | -1.19870 |

| $\gamma_L[\text{a}]\text{g}^+\text{g}^+$ | 14.7000000 |          |          |
|------------------------------------------|------------|----------|----------|
| C                                        | 0.00000    | 0.00000  | 0.00000  |
| H                                        | 1.08940    | 0.00000  | 0.00000  |
| H                                        | -0.36081   | 1.03401  | 0.00000  |
| H                                        | -0.35989   | -0.47481 | 0.91933  |
| C                                        | -0.47512   | -0.74363 | -1.22888 |
| O                                        | 0.31577    | -1.25360 | -2.03541 |
| N                                        | -1.82452   | -0.82812 | -1.42708 |
| C                                        | -2.87209   | -0.34429 | -0.50372 |
| H                                        | -2.73012   | -0.78213 | 0.49176  |
| H                                        | -2.83869   | 0.74455  | -0.40355 |
| C                                        | -4.17840   | -0.83089 | -1.14975 |
| H                                        | -4.57697   | -0.07196 | -1.82981 |
| H                                        | -4.94302   | -1.05777 | -0.40136 |
| C                                        | -3.74775   | -2.06900 | -1.96162 |
| C                                        | -2.37119   | -1.64022 | -2.52984 |
| H                                        | -1.69472   | -2.49189 | -2.67530 |
| C                                        | -2.41195   | -0.83559 | -3.85755 |
| O                                        | -3.47186   | -0.44530 | -4.35798 |
| N                                        | -1.19997   | -0.62919 | -4.41447 |
| H                                        | -0.38382   | -0.88880 | -3.86197 |
| C                                        | -1.03521   | 0.18730  | -5.61295 |
| H                                        | -1.19682   | 1.24980  | -5.40046 |
| H                                        | -0.02212   | 0.04762  | -5.99276 |
| H                                        | -1.75471   | -0.11987 | -6.37475 |
| C                                        | -4.82743   | -2.57223 | -2.93252 |
| H                                        | -5.67173   | -2.94294 | -2.33347 |
| H                                        | -5.19104   | -1.73693 | -3.53500 |
| C                                        | -4.37461   | -3.64791 | -3.92791 |
| H                                        | -5.19061   | -3.92910 | -4.60086 |
| H                                        | -3.57518   | -3.26449 | -4.56492 |
| N                                        | -3.85142   | -4.89067 | -3.31173 |
| H                                        | -2.86014   | -4.92479 | -3.11119 |
| C                                        | -4.56686   | -5.96235 | -2.97689 |
| N                                        | -5.90796   | -5.92793 | -2.98409 |
| N                                        | -3.94862   | -7.10747 | -2.63236 |
| H                                        | -6.40862   | -5.05546 | -3.05945 |
| H                                        | -2.96743   | -7.25174 | -2.82048 |
| H                                        | -6.45190   | -6.77769 | -2.95641 |
| H                                        | -4.44501   | -7.85126 | -2.16424 |
| H                                        | -3.52727   | -2.87326 | -1.24318 |

| $\gamma_L [^\circ] \text{tg}^{-1}$ | 15.4000000 |          |          |
|------------------------------------|------------|----------|----------|
| C                                  | 0.00000    | 0.00000  | 0.00000  |
| H                                  | 1.08947    | 0.00000  | 0.00000  |
| H                                  | -0.35863   | 1.03513  | 0.00000  |
| H                                  | -0.36078   | -0.47502 | 0.91879  |
| C                                  | -0.47445   | -0.73911 | -1.23290 |
| O                                  | 0.31410    | -1.20819 | -2.06268 |
| N                                  | -1.82591   | -0.86663 | -1.40317 |
| C                                  | -2.87825   | -0.39378 | -0.48284 |
| H                                  | -2.72551   | -0.82287 | 0.51522  |
| H                                  | -2.86808   | 0.69626  | -0.38685 |
| C                                  | -4.18626   | -0.89631 | -1.12770 |
| H                                  | -4.60439   | -0.13998 | -1.79780 |
| H                                  | -4.93188   | -1.13839 | -0.36370 |
| C                                  | -3.73743   | -2.10873 | -1.96314 |
| C                                  | -2.36861   | -1.65317 | -2.52365 |
| H                                  | -1.70033   | -2.49991 | -2.70956 |
| C                                  | -2.43813   | -0.78003 | -3.80595 |
| O                                  | -3.48632   | -0.24518 | -4.18343 |
| N                                  | -1.25704   | -0.65784 | -4.44687 |
| H                                  | -0.43018   | -0.98617 | -3.95189 |
| C                                  | -1.09843   | 0.21460  | -5.60532 |
| H                                  | -1.07076   | 1.27104  | -5.31486 |
| H                                  | -0.16695   | -0.04245 | -6.11210 |
| H                                  | -1.93630   | 0.07007  | -6.28955 |
| C                                  | -4.73628   | -2.62739 | -3.00969 |
| H                                  | -4.99006   | -1.80645 | -3.68422 |
| H                                  | -4.26834   | -3.40441 | -3.62898 |
| C                                  | -6.04383   | -3.17768 | -2.43643 |
| H                                  | -6.52159   | -2.42987 | -1.79137 |
| H                                  | -6.72517   | -3.41999 | -3.25883 |
| N                                  | -5.81318   | -4.41587 | -1.65696 |
| H                                  | -4.85736   | -4.62193 | -1.39603 |
| C                                  | -6.75783   | -5.25843 | -1.24600 |
| N                                  | -8.05463   | -4.93968 | -1.37004 |
| N                                  | -6.42406   | -6.44481 | -0.70540 |
| H                                  | -8.34122   | -4.01142 | -1.64178 |
| H                                  | -5.48136   | -6.80070 | -0.76151 |
| H                                  | -8.77982   | -5.62764 | -1.23076 |
| H                                  | -7.10310   | -7.01078 | -0.21839 |
| H                                  | -3.49207   | -2.91790 | -1.25379 |

| $\gamma_L [^\circ] \text{tg}^-$ | 15.7000000 |          |          |
|---------------------------------|------------|----------|----------|
| C                               | 0.00000    | 0.00000  | 0.00000  |
| H                               | 1.08941    | 0.00000  | 0.00000  |
| H                               | -0.35874   | 1.03511  | 0.00000  |
| H                               | -0.36041   | -0.47518 | 0.91886  |
| C                               | -0.47380   | -0.74019 | -1.23275 |
| O                               | 0.31605    | -1.21299 | -2.05914 |
| N                               | -1.82489   | -0.86456 | -1.40547 |
| C                               | -2.87233   | -0.38516 | -0.48886 |
| H                               | -2.72696   | -0.81532 | 0.50993  |
| H                               | -2.85427   | 0.70489  | -0.39315 |
| C                               | -4.18098   | -0.87112 | -1.13890 |
| H                               | -4.58804   | -0.10832 | -1.80911 |
| H                               | -4.93059   | -1.09601 | -0.37254 |
| C                               | -3.74689   | -2.09243 | -1.96808 |
| C                               | -2.37169   | -1.65066 | -2.52343 |
| H                               | -1.70928   | -2.50405 | -2.70025 |
| C                               | -2.41701   | -0.78142 | -3.81035 |
| O                               | -3.45645   | -0.24369 | -4.20985 |
| N                               | -1.22425   | -0.66142 | -4.42857 |
| H                               | -0.40741   | -0.99546 | -3.92019 |
| C                               | -1.04039   | 0.21161  | -5.58287 |
| H                               | -1.01419   | 1.26752  | -5.29036 |
| H                               | -0.10004   | -0.04818 | -6.07154 |
| H                               | -1.86525   | 0.07177  | -6.28369 |
| C                               | -4.74907   | -2.60051 | -3.01882 |
| H                               | -5.05433   | -1.75324 | -3.63981 |
| H                               | -4.24656   | -3.31954 | -3.68137 |
| C                               | -6.03279   | -3.21205 | -2.44862 |
| H                               | -6.51013   | -2.52865 | -1.74367 |
| H                               | -6.76415   | -3.39441 | -3.24209 |
| N                               | -5.84486   | -4.49033 | -1.71940 |
| H                               | -5.65333   | -4.43662 | -0.72767 |
| C                               | -5.84780   | -5.70646 | -2.26317 |
| N                               | -5.84978   | -5.86857 | -3.59436 |
| N                               | -5.86064   | -6.79852 | -1.47605 |
| H                               | -5.65467   | -5.09939 | -4.21730 |
| H                               | -6.08286   | -6.73568 | -0.49356 |
| H                               | -6.06711   | -6.76196 | -4.01085 |
| H                               | -5.64205   | -7.71273 | -1.84385 |
| H                               | -3.52645   | -2.90755 | -1.26196 |

| $\alpha_L[d]ttc$ | 17.3000000 |          |          |
|------------------|------------|----------|----------|
| C                | 0.00000    | 0.00000  | 0.00000  |
| H                | 1.08958    | 0.00000  | 0.00000  |
| H                | -0.36429   | 1.03254  | 0.00000  |
| H                | -0.35233   | -0.47417 | 0.92331  |
| C                | -0.47259   | -0.77446 | -1.21453 |
| O                | 0.29346    | -1.40198 | -1.93736 |
| N                | -1.83213   | -0.74039 | -1.48824 |
| C                | -2.85524   | -0.22760 | -0.56704 |
| H                | -2.72897   | -0.67413 | 0.42770  |
| H                | -2.79622   | 0.85946  | -0.45632 |
| C                | -4.17418   | -0.67137 | -1.20962 |
| H                | -4.51267   | 0.06841  | -1.94650 |
| H                | -4.96075   | -0.78529 | -0.45771 |
| C                | -3.79911   | -1.98305 | -1.92303 |
| C                | -2.38104   | -1.66110 | -2.48387 |
| H                | -1.75645   | -2.55945 | -2.52077 |
| C                | -2.36756   | -1.12298 | -3.93252 |
| O                | -2.82413   | -1.82560 | -4.84064 |
| N                | -1.84883   | 0.10812  | -4.12155 |
| H                | -1.69087   | 0.67225  | -3.29861 |
| C                | -1.62619   | 0.69104  | -5.43787 |
| H                | -2.38194   | 1.45152  | -5.66464 |
| H                | -0.63473   | 1.14906  | -5.48465 |
| H                | -1.68570   | -0.10645 | -6.17885 |
| C                | -4.82756   | -2.51654 | -2.93560 |
| H                | -5.11148   | -1.73191 | -3.64056 |
| H                | -4.33338   | -3.27891 | -3.53973 |
| C                | -6.08856   | -3.04815 | -2.24758 |
| H                | -5.85954   | -3.89640 | -1.58938 |
| H                | -6.53407   | -2.27088 | -1.62434 |
| N                | -7.18593   | -3.46723 | -3.17129 |
| H                | -8.11337   | -3.19690 | -2.86870 |
| C                | -7.12995   | -3.90443 | -4.43402 |
| N                | -6.10111   | -4.63048 | -4.88897 |
| N                | -8.16637   | -3.67271 | -5.26069 |
| H                | -5.41280   | -5.00787 | -4.25606 |
| H                | -8.81999   | -2.92386 | -5.08462 |
| H                | -5.91483   | -4.70748 | -5.87904 |
| H                | -8.30557   | -4.22874 | -6.09240 |
| H                | -3.65034   | -2.74685 | -1.14706 |

|                            |            |          |          |
|----------------------------|------------|----------|----------|
| <b>Y<sub>L</sub>[u]ttc</b> | 18.1000000 |          |          |
| C                          | 0.00000    | 0.00000  | 0.00000  |
| H                          | 1.08959    | 0.00000  | 0.00000  |
| H                          | -0.36342   | 1.03192  | 0.00000  |
| H                          | -0.34660   | -0.48240 | 0.92095  |
| C                          | -0.46199   | -0.76617 | -1.22215 |
| O                          | 0.33661    | -1.40174 | -1.92124 |
| N                          | -1.79475   | -0.72795 | -1.54535 |
| C                          | -2.88650   | -0.23094 | -0.70226 |
| H                          | -2.53279   | 0.01130  | 0.29930  |
| H                          | -3.31949   | 0.67973  | -1.13754 |
| C                          | -3.88145   | -1.39683 | -0.72020 |
| H                          | -4.89562   | -1.08066 | -0.45657 |
| H                          | -3.57301   | -2.15059 | 0.01083  |
| C                          | -3.78008   | -1.97046 | -2.15853 |
| C                          | -2.31833   | -1.59928 | -2.62005 |
| H                          | -1.70173   | -2.50313 | -2.62781 |
| C                          | -2.10101   | -0.91466 | -4.01456 |
| O                          | -2.97268   | -0.30703 | -4.66701 |
| N                          | -0.83950   | -1.02984 | -4.45479 |
| H                          | -0.15111   | -1.38613 | -3.79032 |
| C                          | -0.38729   | -0.38990 | -5.68524 |
| H                          | -0.44936   | 0.70096  | -5.61282 |
| H                          | 0.64816    | -0.68137 | -5.86372 |
| H                          | -1.00260   | -0.71384 | -6.52805 |
| C                          | -4.84952   | -1.43117 | -3.11209 |
| H                          | -4.79631   | -0.33923 | -3.09878 |
| H                          | -4.57176   | -1.77367 | -4.10570 |
| C                          | -6.29497   | -1.84020 | -2.88636 |
| H                          | -6.44067   | -2.91362 | -3.05708 |
| H                          | -6.64007   | -1.61000 | -1.87441 |
| N                          | -7.21171   | -1.09061 | -3.79319 |
| H                          | -8.17385   | -1.07898 | -3.48069 |
| C                          | -7.02944   | -0.52533 | -4.99907 |
| N                          | -5.85022   | -0.21384 | -5.54541 |
| N                          | -8.14200   | -0.22332 | -5.70960 |
| H                          | -4.94355   | -0.23709 | -5.07276 |
| H                          | -9.03739   | -0.63310 | -5.49172 |
| H                          | -5.82797   | 0.05023  | -6.52001 |
| H                          | -8.10856   | 0.43482  | -6.47367 |
| H                          | -3.85595   | -3.06314 | -2.13325 |

| $\gamma_L[u]g^+t$ | 18.8000000 |          |          |
|-------------------|------------|----------|----------|
| C                 | 0.00000    | 0.00000  | 0.00000  |
| H                 | 1.08947    | 0.00000  | 0.00000  |
| H                 | -0.36763   | 1.03032  | 0.00000  |
| H                 | -0.34836   | -0.47607 | 0.92361  |
| C                 | -0.46310   | -0.78221 | -1.21175 |
| O                 | 0.33798    | -1.43944 | -1.88469 |
| N                 | -1.79967   | -0.72103 | -1.54060 |
| C                 | -2.85947   | -0.11141 | -0.58400 |
| C                 | -4.20046   | -0.98333 | -0.95824 |
| C                 | -3.95962   | -1.45659 | -2.40878 |
| C                 | -2.40149   | -1.68124 | -2.51551 |
| H                 | -2.19598   | -2.71342 | -2.19365 |
| C                 | -1.83384   | -1.67922 | -3.94562 |
| O                 | -2.45424   | -2.33673 | -4.80629 |
| N                 | -0.78986   | -0.88680 | -4.25927 |
| H                 | -0.16736   | -0.69063 | -3.47940 |
| C                 | -0.11919   | -0.98196 | -5.55736 |
| H                 | 0.05131    | 0.01684  | -5.96994 |
| H                 | 0.84867    | -1.47976 | -5.44261 |
| H                 | -0.73003   | -1.57810 | -6.23696 |
| C                 | -4.89252   | -0.72877 | -3.41617 |
| H                 | -4.79028   | -1.22134 | -4.38913 |
| H                 | -5.90598   | -0.96324 | -3.07208 |
| C                 | -4.89044   | 0.78403  | -3.67599 |
| H                 | -5.78701   | 1.02414  | -4.26090 |
| H                 | -4.95022   | 1.33250  | -2.72479 |
| N                 | -3.69966   | 1.23050  | -4.40951 |
| H                 | -3.10194   | 0.47616  | -4.77856 |
| C                 | -3.50336   | 2.46897  | -4.83958 |
| N                 | -4.27488   | 3.48495  | -4.41226 |
| N                 | -2.51935   | 2.72743  | -5.72165 |
| H                 | -5.00042   | 3.33578  | -3.72918 |
| H                 | -1.95772   | 1.97500  | -6.09225 |
| H                 | -4.19895   | 4.40704  | -4.81370 |
| H                 | -2.23640   | 3.67093  | -5.93788 |
| H                 | -4.35893   | -2.47292 | -2.47405 |
| H                 | -4.22126   | -1.82873 | -0.30267 |
| H                 | -5.10196   | -0.41289 | -0.87586 |
| H                 | -2.53528   | -0.25208 | 0.42595  |
| H                 | -3.07414   | 0.91906  | -0.77624 |

| $\alpha_L[d]g^-s^-$ | 21.6000000 |          |          |
|---------------------|------------|----------|----------|
| C                   | 0.00000    | 0.00000  | 0.00000  |
| H                   | 1.08954    | 0.00000  | 0.00000  |
| H                   | -0.35730   | 1.03592  | 0.00000  |
| H                   | -0.36055   | -0.47311 | 0.91988  |
| C                   | -0.47270   | -0.75270 | -1.22630 |
| O                   | 0.29604    | -1.22805 | -2.05728 |
| N                   | -1.83795   | -0.87457 | -1.40854 |
| C                   | -2.88998   | -0.43871 | -0.46724 |
| H                   | -2.87494   | -1.03250 | 0.45714  |
| H                   | -2.76156   | 0.61200  | -0.19445 |
| C                   | -4.17870   | -0.69787 | -1.25914 |
| H                   | -4.36950   | 0.14663  | -1.92853 |
| H                   | -5.04853   | -0.81484 | -0.60603 |
| C                   | -3.83705   | -1.98681 | -2.02858 |
| C                   | -2.34131   | -1.80282 | -2.43050 |
| H                   | -1.80582   | -2.75544 | -2.38451 |
| C                   | -2.13033   | -1.32501 | -3.87516 |
| O                   | -2.15519   | -2.12210 | -4.79982 |
| N                   | -2.06454   | 0.05062  | -4.08424 |
| H                   | -1.72021   | 0.54107  | -3.26369 |
| C                   | -1.47983   | 0.51673  | -5.35620 |
| H                   | -0.42483   | 0.23668  | -5.43413 |
| H                   | -2.01641   | 0.06276  | -6.18995 |
| H                   | -1.56844   | 1.60417  | -5.40977 |
| C                   | -4.79013   | -2.55336 | -3.09896 |
| H                   | -4.54121   | -3.60913 | -3.24767 |
| H                   | -5.80736   | -2.53858 | -2.68568 |
| C                   | -4.84268   | -1.93741 | -4.50572 |
| H                   | -4.02269   | -2.27410 | -5.13557 |
| H                   | -5.75718   | -2.29162 | -4.99380 |
| N                   | -4.89118   | -0.46244 | -4.54555 |
| H                   | -4.03120   | 0.02771  | -4.33312 |
| C                   | -5.98056   | 0.28861  | -4.72149 |
| N                   | -7.11504   | -0.22137 | -5.21596 |
| N                   | -5.93542   | 1.59996  | -4.40790 |
| H                   | -7.16937   | -1.14276 | -5.66624 |
| H                   | -5.21171   | 1.97365  | -3.81200 |
| H                   | -7.97359   | 0.30356  | -5.13529 |
| H                   | -6.64720   | 2.23939  | -4.72850 |
| H                   | -3.80691   | -2.77589 | -1.26471 |
